# Supplementary material for: Genetic diversity and structure of the noble crayfish populations in the Balkan Peninsula revealed by mitochondrial and microsatellite DNA markers
Source: PeerJ. 2021 Aug 4;9:e11838. doi: 10.7717/peerj.11838 (PMC8349172; doi:10.7717/peerj.11838)
Supplement: Supplemental Information 1 [file peerj-09-11838-s001.xlsx]

## Sheet: Table S1
Table S1. Information on the Astacus astacus populations sampling sites (country, water body, sea basin), sample ID, COI haplotype names (350 bp long-this study, 655 bp long-this study, haplotype names from Schrimpf et al. (2014) and Laggis et al. (2017) and accesion number), 16S rRNA haplotype names and accesion numbers ( this study, Schrimpf et al. (2014) and Laggis et al. (2017)), names of con…
Country and sampling site	Water body/river	Sea Basin	Sample ID	COI haplotype name (350 bp long) "Ssh haplotype"	COI haplotype name (655 bp long) samples used in microsatellite analyses "Lshm haplotype "	COI haplotype names according to Schrimpf et al. (2014) and Laggis et al. (2017)	Acc. No. COI (Schrimpf et al. (2014, Laggis et al. (2017) and Mrugala et al., (2017))	Acc. No. COI long (this study)	Acc. No. 16S rRNA (this study)	16S haplotype (Schrimpf et al. (2014) and Laggis et al. (2017))	Acc. No. 16S (Schrimpf et al. (2014) and Laggis et al. (2017))	Concatenated haplotype	Latitude Longitude
Albania: Devolli River	Seman	Adriatic Sea	>ID609				KY682290						40.7103N, 20.8636E
Albania: Devolli River	Seman	Adriatic Sea	>ID610				KY682290						40.7103N, 20.8636E
Albania: Devolli River	Seman	Adriatic Sea	>ID611				KY682291						40.7103N, 20.8636E
Albania: Devolli River	Seman	Adriatic Sea	>ID612				KY682291						40.7103N, 20.8636E
Albania: Lake Ohrid	Lake Ohrid/Drim	Adriatic Sea	>ID608				KY682289						40.9836N, 20.6397E
Albania: Lake Prespa	Lake Ohrid/Drim	Adriatic Sea	>PRJ02	Ssh9	Lshm8			MW726440	MW726238			Hap50	40.865N, 20.944E
Albania: Lake Prespa	Lake Ohrid/Drim	Adriatic Sea	>PRJ03	Ssh9	Lshm8			MW726439	MW726237			Hap50	40.865N, 20.944E
Albania: Lake Prespa	Lake Ohrid/Drim	Adriatic Sea	>PRJ04	Ssh9	Lshm8			MW726438					40.865N, 20.944E
Albania: Lake Prespa	Lake Ohrid/Drim	Adriatic Sea	>PRJ05	Ssh9	Lshm8			MW726437	MW726236			Hap50	40.865N, 20.944E
Albania: Lake Prespa	Lake Ohrid/Drim	Adriatic Sea	>PRJ06	Ssh9	Lshm8			MW726436	MW726235			Hap50	40.865N, 20.944E
Albania: Lake Prespa	Lake Ohrid/Drim	Adriatic Sea	>PRJ07	Ssh9	Lshm8			MW726435	MW726234			Hap50	40.865N, 20.944E
Albania: Lake Prespa	Lake Ohrid/Drim	Adriatic Sea	>PRJ08	Ssh9	Lshm8			MW726434	MW726233			Hap50	40.865N, 20.944E
Albania: Lake Prespa	Lake Ohrid/Drim	Adriatic Sea	>PRJ11	Ssh9	Lshm8			MW726433					40.865N, 20.944E
Albania: Lake Prespa	Lake Ohrid/Drim	Adriatic Sea	>PRJ12	Ssh9	Lshm8			MW726432					40.865N, 20.944E
Albania: Lake Prespa	Lake Ohrid/Drim	Adriatic Sea	>PRJ13	Ssh9	Lshm8			MW726431					40.865N, 20.944E
Albania: Lake Prespa	Lake Ohrid/Drim	Adriatic Sea	>PRJ14	Ssh9	Lshm8			MW726430					40.865N, 20.944E
Albania: Lake Prespa	Lake Ohrid/Drim	Adriatic Sea	>PRJ15	Ssh9	Lshm8			MW726429	MW726232	Aas19_16S		Hap50	40.865N, 20.944E
Albania: Lake Prespa	Lake Ohrid/Drim	Adriatic Sea	>PRJ16	Ssh9	Lshm8			MW726428	MW726231	Aas19_16S		Hap50	40.865N, 20.944E
Austria: Freundsheimer Weiher	Danube	Black Sea	>ID365			Aas01_COI	KF888296			Aas01_16S	KF888279	Hap01	47.304N, 10.954E
Austria: Freundsheimer Weiher	Danube	Black Sea	>ID366			Aas01_COI	KF888296			Aas01_16S	KF888279	Hap01	47.304N, 10.954E
Austria: Freundsheimer Weiher	Danube	Black Sea	>ID367			Aas18_COI	KF888313			Aas08_16S	KF888286	Hap25	47.304N, 10.954E
Belgium: Farm in Belgium	Hatchery/Meuse	North Sea	>ID549			Aas01_COI	KF888296			Aas01_16S	KF888279	Hap01	n/a
Belgium: Farm in Belgium	Hatchery/Meuse	North Sea	>ID550			Aas24_COI	KF888319			Aas01_16S	KF888279	Hap35	n/a
Belgium: Florenville	Meuse	North Sea	>ID151			Aas01_COI	KF888296			Aas01_16S	KF888279	Hap01	49.700N, 5.307E
Belgium: Florenville	Meuse	North Sea	>ID152			Aas01_COI	KF888296			Aas01_16S	KF888279	Hap01	49.700N, 5.307E
Belgium: Florenville	Meuse	North Sea	>ID153			Aas01_COI	KF888296			Aas01_16S	KF888279	Hap01	49.700N, 5.307E
Belgium: Florenville	Meuse	North Sea	>ID154			Aas01_COI	KF888296			Aas01_16S	KF888279	Hap01	49.700N, 5.307E
Belgium: Florenville	Meuse	North Sea	>ID155			Aas01_COI	KF888296			Aas01_16S	KF888279	Hap01	49.700N, 5.307E
Belgium: Libramont	Meuse	North Sea	>ID156			Aas01_COI	KF888296			Aas01_16S	KF888279	Hap01	49.927N, 5.371E
Belgium: Libramont	Meuse	North Sea	>ID157			Aas01_COI	KF888296			Aas01_16S	KF888279	Hap01	49.927N, 5.371E
Belgium: Libramont	Meuse	North Sea	>ID158			Aas01_COI	KF888296			Aas04_16S	KF888282	Hap13	49.927N, 5.371E
Belgium: Libramont	Meuse	North Sea	>ID159			Aas01_COI	KF888296			Aas04_16S	KF888282	Hap13	49.927N, 5.371E
Bulgaria: Beli Osam	Danube	Black Sea	>ID353			Aas09_COI	KF888304			Aas01_16S	KF888279	Hap11	42.858N, 24.655E
Bulgaria: Beli Osam	Danube	Black Sea	>ID354			Aas09_COI	KF888304			Aas01_16S	KF888279	Hap11	42.858N, 24.655E
Bulgaria: Beli Osam	Danube	Black Sea	>ID355			Aas09_COI	KF888304			Aas01_16S	KF888279	Hap11	42.858N, 24.655E
Bulgaria: Beli Osam	Danube	Black Sea	>ID356			Aas09_COI	KF888304			Aas01_16S	KF888279	Hap11	42.858N, 24.655E
Bulgaria: Gorna Trape	Danube	Black Sea	>ID357			Aas01_COI	KF888296			Aas01_16S	KF888279	Hap01	43.444N, 25.073E
Bulgaria: Gorna Trape	Danube	Black Sea	>ID358			Aas09_COI	KF888304			Aas01_16S	KF888279	Hap11	43.444N, 25.073E
Bulgaria: Gorna Trape	Danube	Black Sea	>ID359			Aas09_COI	KF888304			Aas01_16S	KF888279	Hap11	43.444N, 25.073E
Bulgaria: Gorna Trape	Danube	Black Sea	>ID360			Aas09_COI	KF888304			Aas01_16S	KF888279	Hap11	43.444N, 25.073E
Bulgaria: Gorna Trape	Danube	Black Sea	>ID361			Aas09_COI	KF888304			Aas01_16S	KF888279	Hap11	43.444N, 25.073E
Bulgaria: Gorna Trape	Danube	Black Sea	>ID362			Aas09_COI	KF888304			Aas01_16S	KF888279	Hap11	43.444N, 25.073E
Bulgaria: Gorna Trape	Danube	Black Sea	>ID363			Aas13_COI	KF888308			Aas01_16S	KF888279	Hap17	43.444N, 25.073E
Bulgaria: Gorna Trape	Danube	Black Sea	>ID364			Aas13_COI	KF888308			Aas01_16S	KF888279	Hap17	43.444N, 25.073E
Bulgaria: Razdvec	Danube	Black Sea	>ID347			Aas01_COI	KF888296			Aas01_16S	KF888279	Hap01	43.463N, 24.908E
Bulgaria: Razdvec	Danube	Black Sea	>ID348			Aas01_COI	KF888296			Aas01_16S	KF888279	Hap01	43.463N, 24.908E
Bulgaria: Razdvec	Danube	Black Sea	>ID349			Aas01_COI	KF888296			Aas01_16S	KF888279	Hap01	43.463N, 24.908E
Bulgaria: Razdvec	Danube	Black Sea	>ID350			Aas01_COI	KF888296			Aas01_16S	KF888279	Hap01	43.463N, 24.908E
Bulgaria: Razdvec	Danube	Black Sea	>ID351			Aas10_COI	KF888305			Aas01_16S	KF888279	Hap12	43.463N, 24.908E
Bulgaria: Razdvec	Danube	Black Sea	>ID352			Aas11_COI	KF888306			Aas01_16S	KF888279	Hap14	43.463N, 24.908E
Croatia: Bačica Creek, Rešetari	Sava/Danube	Black Sea	>ID506	Ssh7		Aas26_COI	KF888321	MW726498	MW726257	Aas15_16S	KF888293	Hap42	45.300N, 17.351E
Croatia: Bačica Creek, Rešetari	Sava/Danube	Black Sea	>ID507	Ssh7		Aas26_COI	KF888321	MW726496	MW726255	Aas15_16S	KF888293	Hap42	45.300N, 17.351E
Croatia: Bačica Creek, Rešetari	Sava/Danube	Black Sea	>ID508	Ssh7		Aas26_COI	KF888321	MW726494	MW726253	Aas15_16S	KF888293	Hap42	45.300N, 17.351E
Croatia: Bačica Creek, Rešetari	Sava/Danube	Black Sea	>ID509			Aas28_COI	KF888323	MW726495	MW726254	Aas15_16S	KF888293	Hap44	45.300N, 17.351E
Croatia: Bašnica River, Gračac	Otuča	Adriatic Sea	>ID510	Ssh8		Aas27_COI	KF888322	MW726492	MW726251	Aas15_16S	KF888293	Hap43	44.303N, 15.855E
Croatia: Bašnica River, Gračac	Otuča	Adriatic Sea	>ID511	Ssh8		Aas27_COI	KF888322	MW726491	MW726250	Aas15_16S	KF888293	Hap43	44.303N, 15.855E
Croatia: Dubočanka River	Sava/Danube	Black Sea	>Aa47_Dubocanka					MW726477					45.471N, 17.657E
Croatia: Dubočanka River	Sava/Danube	Black Sea	>ID513			Aas27_COI	KF888322			Aas15_16S	KF888293	Hap43	45.471N, 17.657E
Croatia: Jankovac Stream, Voćin	Drava/Danube	Black Sea	>AA48_VOCIN	Ssh7	Lshm6			MW726476					45.522N, 17.684E
Croatia: Jankovac Stream, Voćin	Drava/Danube	Black Sea	>JANK02	Ssh2	Lshm2			MW726592					45.522N, 17.684E
Croatia: Jankovac Stream, Voćin	Drava/Danube	Black Sea	>JANK05	Ssh2	Lshm2			MW726591					45.522N, 17.684E
Croatia: Jankovac Stream, Voćin	Drava/Danube	Black Sea	>JANK08	Ssh2	Lshm2			MW726590					45.522N, 17.684E
Croatia: Jankovac Stream, Voćin	Drava/Danube	Black Sea	>JANK23	Ssh2	Lshm2			MW726589					45.522N, 17.684E
Croatia: Jankovac Stream, Voćin	Drava/Danube	Black Sea	>JANK24	Ssh2	Lshm2			MW726588					45.522N, 17.684E
Croatia: Jankovac Stream, Voćin	Drava/Danube	Black Sea	>JANK25	Ssh2	Lshm2			MW726587					45.522N, 17.684E
Croatia: Jankovac Stream, Voćin	Drava/Danube	Black Sea	>JANK26	Ssh2	Lshm2			MW726586					45.522N, 17.684E
Croatia: Jankovac Stream, Voćin	Drava/Danube	Black Sea	>JANK27	Ssh2	Lshm2			MW726585					45.522N, 17.684E
Croatia: Jankovac Stream, Voćin	Drava/Danube	Black Sea	>JANK28	Ssh2	Lshm2			MW726584					45.522N, 17.684E
Croatia: Jankovac Stream, Voćin	Drava/Danube	Black Sea	>JANK29	Ssh2	Lshm2			MW726583					45.522N, 17.684E
Croatia: Jankovac Stream, Voćin	Drava/Danube	Black Sea	>JANK01	Ssh7	Lshm6			MW726470					45.522N, 17.684E
Croatia: Jankovac Stream, Voćin	Drava/Danube	Black Sea	>JANK03	Ssh7	Lshm6			MW726469					45.522N, 17.684E
Croatia: Jankovac Stream, Voćin	Drava/Danube	Black Sea	>JANK07	Ssh7	Lshm6			MW726468					45.522N, 17.684E
Croatia: Jankovac Stream, Voćin	Drava/Danube	Black Sea	>JANK30	Ssh7	Lshm6			MW726467					45.522N, 17.684E
Croatia: Jaruga River, Stajničko polje	Sava/Danube	Black Sea	>JAR01	Ssh12	Lshm11			MW726373					45.048N, 15.225E
Croatia: Jaruga River, Stajničko polje	Sava/Danube	Black Sea	>JAR02	Ssh12	Lshm11			MW726372					45.048N, 15.225E
Croatia: Jaruga River, Stajničko polje	Sava/Danube	Black Sea	>JAR03	Ssh12	Lshm11			MW726371					45.048N, 15.225E
Croatia: Jaruga River, Stajničko polje	Sava/Danube	Black Sea	>JAR04	Ssh12	Lshm11			MW726370					45.048N, 15.225E
Croatia: Jaruga River, Stajničko polje	Sava/Danube	Black Sea	>JAR05	Ssh12	Lshm11			MW726369					45.048N, 15.225E
Croatia: Jaruga River, Stajničko polje	Sava/Danube	Black Sea	>JAR06	Ssh12	Lshm11			MW726368					45.048N, 15.225E
Croatia: Jaruga River, Stajničko polje	Sava/Danube	Black Sea	>JAR07	Ssh12	Lshm11			MW726367					45.048N, 15.225E
Croatia: Jaruga River, Stajničko polje	Sava/Danube	Black Sea	>JAR08	Ssh12	Lshm11			MW726366					45.048N, 15.225E
Croatia: Jaruga River, Stajničko polje	Sava/Danube	Black Sea	>JAR09	Ssh12	Lshm11			MW726365					45.048N, 15.225E
Croatia: Jaruga River, Stajničko polje	Sava/Danube	Black Sea	>JAR10	Ssh12	Lshm11			MW726364					45.048N, 15.225E
Croatia: Jaruga River, Stajničko polje	Sava/Danube	Black Sea	>JAR11	Ssh12	Lshm11			MW726363					45.048N, 15.225E
Croatia: Jaruga River, Stajničko polje	Sava/Danube	Black Sea	>JAR12	Ssh12	Lshm11			MW726362					45.048N, 15.225E
Croatia: Jaruga River, Stajničko polje	Sava/Danube	Black Sea	>JAR13	Ssh12	Lshm11			MW726361					45.048N, 15.225E
Croatia: Jaruga River, Stajničko polje	Sava/Danube	Black Sea	>JAR14	Ssh12	Lshm11			MW726360					45.048N, 15.225E
Croatia: Jaruga River, Stajničko polje	Sava/Danube	Black Sea	>JAR15	Ssh12	Lshm11			MW726359					45.048N, 15.225E
Croatia: Jaruga River, Stajničko polje	Sava/Danube	Black Sea	>JAR16	Ssh12	Lshm11			MW726358					45.048N, 15.225E
Croatia: Jaruga River, Stajničko polje	Sava/Danube	Black Sea	>Aa54_Jaruga	Ssh12	Lshm11			MW726633	MW726334			Hap28	45.048N, 15.225E
Croatia: Jaruga River, Stajničko polje	Sava/Danube	Black Sea	>Aa55_Jaruga	Ssh12	Lshm11			MW726632	MW726333			Hap28	45.048N, 15.225E
Croatia: Jaruga River, Stajničko polje	Sava/Danube	Black Sea	>ID514			Aas20_COI	KF888315			Aas10_16S	KF888288	Hap28	45.048N, 15.225E
Croatia: Jaruga River, Stajničko polje	Sava/Danube	Black Sea	>ID515			Aas20_COI	KF888315			Aas10_16S	KF888288	Hap28	45.048N, 15.225E
Croatia: Krapina River	Sava/Danube	Black Sea	>ID517 (=Aa32_Krapina)			Aas27_COI	KF888322	MW726489	MW726248	Aas15_16S	KF888293	Hap43	46.054N, 16.171E
Croatia: Lake Borovik	Vuka/Danube	Black Sea	>ID512 (=Aa31_Borovik)	Ssh8		Aas27_COI	KF888322	MW726490	MW726249	Aas15_16S	KF888293	Hap43	45.391N, 18.194E
Croatia: Lake Ježevo, Velika Gorica	Sava/Danube	Black Sea	>ID516 (=Aa38_Jezev)			Aas26_COI	KF888321	MW726485	MW726245	Aas15_16S	KF888293	Hap42	45.702N, 16.117E
Croatia: Lake Maksimir, Zagreb	Sava/Danube	Black Sea	>AAMAK01	Ssh11	Lshm10			MW726388					45.831N, 16.026E
Croatia: Lake Maksimir, Zagreb	Sava/Danube	Black Sea	>AAMAK02	Ssh11	Lshm10			MW726387					45.831N, 16.026E
Croatia: Lake Maksimir, Zagreb	Sava/Danube	Black Sea	>AAMAK03	Ssh11	Lshm10			MW726386					45.831N, 16.026E
Croatia: Lake Maksimir, Zagreb	Sava/Danube	Black Sea	>AAMAK04	Ssh11	Lshm10			MW726385					45.831N, 16.026E
Croatia: Lake Maksimir, Zagreb	Sava/Danube	Black Sea	>AAMAK05	Ssh11	Lshm10			MW726384					45.831N, 16.026E
Croatia: Lake Maksimir, Zagreb	Sava/Danube	Black Sea	>AAMAK06	Ssh11	Lshm10			MW726383					45.831N, 16.026E
Croatia: Lake Maksimir, Zagreb	Sava/Danube	Black Sea	>AAMAK07	Ssh11	Lshm10			MW726382					45.831N, 16.026E
Croatia: Lake Maksimir, Zagreb	Sava/Danube	Black Sea	>AAMAK09	Ssh11	Lshm10			MW726381					45.831N, 16.026E
Croatia: Lake Maksimir, Zagreb	Sava/Danube	Black Sea	>AAMAK10	Ssh11	Lshm10			MW726380					45.831N, 16.026E
Croatia: Lake Maksimir, Zagreb	Sava/Danube	Black Sea	>AAMAK11	Ssh11	Lshm10			MW726379					45.831N, 16.026E
Croatia: Lake Maksimir, Zagreb	Sava/Danube	Black Sea	>AAMAK12	Ssh11	Lshm10			MW726378					45.831N, 16.026E
Croatia: Lake Maksimir, Zagreb	Sava/Danube	Black Sea	>AAMAK13	Ssh11	Lshm10			MW726377					45.831N, 16.026E
Croatia: Lake Maksimir, Zagreb	Sava/Danube	Black Sea	>AAMAK14	Ssh11	Lshm10			MW726376					45.831N, 16.026E
Croatia: Lake Maksimir, Zagreb	Sava/Danube	Black Sea	>AAMAK15	Ssh11	Lshm10			MW726375					45.831N, 16.026E
Croatia: Lake Maksimir, Zagreb	Sava/Danube	Black Sea	>AAMAK16	Ssh11	Lshm10			MW726374					45.831N, 16.026E
Croatia: Lake Motičnjak, Varaždin	Drava/Danube	Black Sea	>MOT02	Ssh2	Lshm2			MW726551					46.305N, 16.386E
Croatia: Lake Motičnjak, Varaždin	Drava/Danube	Black Sea	>MOT03	Ssh2	Lshm2			MW726550					46.305N, 16.386E
Croatia: Lake Motičnjak, Varaždin	Drava/Danube	Black Sea	>MOT73	Ssh2	Lshm2			MW726549					46.305N, 16.386E
Croatia: Lake Motičnjak, Varaždin	Drava/Danube	Black Sea	>MOT75	Ssh2	Lshm2			MW726548					46.305N, 16.386E
Croatia: Lake Motičnjak, Varaždin	Drava/Danube	Black Sea	>MOT77	Ssh2	Lshm2			MW726547					46.305N, 16.386E
Croatia: Lake Motičnjak, Varaždin	Drava/Danube	Black Sea	>MOT78	Ssh2	Lshm2			MW726546					46.305N, 16.386E
Croatia: Lake Motičnjak, Varaždin	Drava/Danube	Black Sea	>MOT01	Ssh7	Lshm6			MW726466					46.305N, 16.386E
Croatia: Lake Motičnjak, Varaždin	Drava/Danube	Black Sea	>MOT04	Ssh7	Lshm6			MW726465					46.305N, 16.386E
Croatia: Lake Motičnjak, Varaždin	Drava/Danube	Black Sea	>MOT05	Ssh7	Lshm6			MW726464					46.305N, 16.386E
Croatia: Lake Motičnjak, Varaždin	Drava/Danube	Black Sea	>MOT07	Ssh7	Lshm6			MW726463					46.305N, 16.386E
Croatia: Lake Motičnjak, Varaždin	Drava/Danube	Black Sea	>MOT08	Ssh7	Lshm6			MW726462					46.305N, 16.386E
Croatia: Lake Motičnjak, Varaždin	Drava/Danube	Black Sea	>MOT09	Ssh7	Lshm6			MW726461					46.305N, 16.386E
Croatia: Lake Motičnjak, Varaždin	Drava/Danube	Black Sea	>MOT72	Ssh7	Lshm6			MW726460					46.305N, 16.386E
Croatia: Lake Motičnjak, Varaždin	Drava/Danube	Black Sea	>MOT74	Ssh7	Lshm6			MW726459					46.305N, 16.386E
Croatia: Lake Motičnjak, Varaždin	Drava/Danube	Black Sea	>MOT76	Ssh7	Lshm6			MW726458					46.305N, 16.386E
Croatia: Lake Motičnjak, Varaždin	Drava/Danube	Black Sea	>MOT79	Ssh7	Lshm6			MW726457					46.305N, 16.386E
Croatia: Lake Totovec, Ivanovec	Drava/Danube	Black Sea	>TOT01	Ssh11	Lshm10			MW726406					46.345N, 16.469E
Croatia: Lake Totovec, Ivanovec	Drava/Danube	Black Sea	>TOT02	Ssh11	Lshm10			MW726405					46.345N, 16.469E
Croatia: Lake Totovec, Ivanovec	Drava/Danube	Black Sea	>TOT03	Ssh11	Lshm10			MW726404					46.345N, 16.469E
Croatia: Lake Totovec, Ivanovec	Drava/Danube	Black Sea	>TOT04	Ssh11	Lshm10			MW726403					46.345N, 16.469E
Croatia: Lake Totovec, Ivanovec	Drava/Danube	Black Sea	>TOT06	Ssh11	Lshm10			MW726402					46.345N, 16.469E
Croatia: Lake Totovec, Ivanovec	Drava/Danube	Black Sea	>TOT07	Ssh11	Lshm10			MW726401					46.345N, 16.469E
Croatia: Lake Totovec, Ivanovec	Drava/Danube	Black Sea	>TOT08	Ssh11	Lshm10			MW726400					46.345N, 16.469E
Croatia: Lake Totovec, Ivanovec	Drava/Danube	Black Sea	>TOT23	Ssh11	Lshm10			MW726399					46.345N, 16.469E
Croatia: Lake Totovec, Ivanovec	Drava/Danube	Black Sea	>TOT24	Ssh11	Lshm10			MW726398					46.345N, 16.469E
Croatia: Lake Totovec, Ivanovec	Drava/Danube	Black Sea	>TOT25	Ssh11	Lshm10			MW726397					46.345N, 16.469E
Croatia: Lake Totovec, Ivanovec	Drava/Danube	Black Sea	>TOT26	Ssh11	Lshm10			MW726396					46.345N, 16.469E
Croatia: Lake Totovec, Ivanovec	Drava/Danube	Black Sea	>TOT27	Ssh11	Lshm10			MW726395					46.345N, 16.469E
Croatia: Lake Totovec, Ivanovec	Drava/Danube	Black Sea	>TOT28	Ssh11	Lshm10			MW726394					46.345N, 16.469E
Croatia: Lake Totovec, Ivanovec	Drava/Danube	Black Sea	>TOT29	Ssh11	Lshm10			MW726393					46.345N, 16.469E
Croatia: Lake Vukovina	Sava/Danube	Black Sea	>ID501			Aas26_COI	KF888321			Aas14_16S	KF888292	Hap41	45.693N, 16.109E
Croatia: Lake Vukovina	Sava/Danube	Black Sea	>ID502			Aas26_COI	KF888321			Aas14_16S	KF888292	Hap41	45.693N, 16.109E
Croatia: Lake Vukovina	Sava/Danube	Black Sea	>ID503			Aas26_COI	KF888321			Aas14_16S	KF888292	Hap41	45.693N, 16.109E
Croatia: Lake Vukovina	Sava/Danube	Black Sea	>ID504			Aas26_COI	KF888321			Aas14_16S	KF888292	Hap41	45.693N, 16.109E
Croatia: Lake Vukovina	Sava/Danube	Black Sea	>ID505			Aas26_COI	KF888321			Aas14_16S	KF888292	Hap41	45.693N, 16.109E
Croatia: Mrežnica River, Generalski Stol	Sava/Danube	Black Sea	>ID518 (=Aa19_Mreznica)			Aas19_COI	KF888322	MW726635	MW726336	Aas10_16S	KF888288	Hap27	45.319N, 15.393E
Croatia: Mrežnica River, Generalski Stol	Sava/Danube	Black Sea	>ID519 (=Aa20_Mreznica)			Aas19_COI	KF888314	MW726634	MW726335	Aas10_16S	KF888288	Hap27	45.319N, 15.393E
Croatia: Paklenica River - NP Paklenica	Paklenica River	Adriatic Sea	>Aa34_Pakl					MW726488	MW726247			Hap42	44.308N, 15.477E
Croatia: Paklenica River - NP Paklenica	Paklenica River	Adriatic Sea	>Aa35_Pakl			Aas26_COI	KF888321	MW726487	MW726246	Aas15_16S	KF888293	Hap42	44.308N, 15.477E
Croatia: Pakra River, Kusonje	Sava/Danube	Black Sea	>Aa39_Pakra					MW726484					45.455N, 17.220E
Croatia: Pakra River, Kusonje	Sava/Danube	Black Sea	>ID522			Aas26_COI	KF888321			Aas15_16S	KF888293	Hap42	45.455N, 17.220E
Croatia: Plitvice Lakes - NP Plitvička jezera	Sava/Danube	Black Sea	>PLI01	Ssh12	Lshm11			MW726392					44.879N, 15.615E
Croatia: Plitvice Lakes - NP Plitvička jezera	Sava/Danube	Black Sea	>PLI02	Ssh12	Lshm11			MW726391					44.879N, 15.615E
Croatia: Plitvice Lakes - NP Plitvička jezera	Sava/Danube	Black Sea	>PLI03	Ssh12	Lshm11			MW726390					44.879N, 15.615E
Croatia: Plitvice Lakes - NP Plitvička jezera	Sava/Danube	Black Sea	>PLI04	Ssh12	Lshm11			MW726389					44.879N, 15.615E
Croatia: Plitvice Lakes - NP Plitvička jezera	Sava/Danube	Black Sea	>ID520			Aas20_COI	KF888314	MW726631	MW726332	Aas10_16S	KF888288	Hap28	44.879N, 15.615E
Croatia: Plitvice Lakes - NP Plitvička jezera	Sava/Danube	Black Sea	>ID521			Aas20_COI	KF888315	MW726630	MW726331	Aas10_16S	KF888288	Hap28	44.879N, 15.615E
Croatia: Rakov Creek	Pazinčica	Adriatic Sea	>ID532 (=Aa25_Rakovp)			Aas30_COI	KF888321	MW726493	MW726252	Aas17_16S	KF888295	Hap46	45.273N, 14.026E
Croatia: Ribnjak Creek, Vladisovo	Sava/Danube	Black Sea	>ID523 (=Aa41_Ribnjak)	Ssh7		Aas26_COI	KF888321	MW726482		Aas15_16S	KF888293	Hap42	45.254N, 17.538E
Croatia: Ribnjak Creek, Vladisovo	Sava/Danube	Black Sea	>ID524 (=Aa42_Ribnjak)	Ssh7		Aas26_COI	KF888321	MW726481		Aas15_16S	KF888293	Hap42	45.254N, 17.538E
Croatia: Ribnjak Creek, Vladisovo	Sava/Danube	Black Sea	>ID525 (=Aa43_Ribnjak)	Ssh8		Aas27_COI	KF888322	MW726480		Aas15_16S	KF888293	Hap43	45.254N, 17.538E
Croatia: Ričica River	Ričica River	Adriatic Sea	>ID542			Aas29_COI	KF888324			Aas16_16S	KF888294	Hap45	44.365N, 15.692E
Croatia: Subocka River	Sava/Danube	Black Sea	>ID528 (=Aa36_Suboc)			Aas26_COI	KF888321	MW726486		Aas15_16S	KF888293	Hap42	45.373N, 17.110E
Croatia: Šumetlica Creek	Sava/Danube	Black Sea	>ID529 (=Aa44_Sumet)			Aas26_COI	KF888321	MW726479		Aas15_16S	KF888293	Hap42	45.347N, 17.383E
Croatia: Šumetlica Creek	Sava/Danube	Black Sea	>ID530 (=Aa45_Sumet)			Aas26_COI	KF888321	MW726478		Aas15_16S	KF888293	Hap42	45.347N, 17.383E
Croatia: Šumetlica Creek	Sava/Danube	Black Sea	>ID531			Aas26_COI	KF888321			Aas15_16S	KF888293	Hap42	45.347N, 17.383E
Croatia: Trećak Creek, Staro Petrovo Selo	Sava/Danube	Black Sea	>AA40_TRECAK	Ssh7				MW726483	MW726244			Hap42	45.227N, 17.535E
Croatia: Trećak Creek, Staro Petrovo Selo	Sava/Danube	Black Sea	>Aa04_StPetrSelo	Ssh7				MW726499	MW726258			Hap42	45.227N, 17.535E
Croatia: Trećak Creek, Staro Petrovo Selo	Sava/Danube	Black Sea	>ID526			Aas26_COI	KF888321			Aas15_16S	KF888293	Hap42	45.227N, 17.535E
Croatia: Trećak Creek, Staro Petrovo Selo	Sava/Danube	Black Sea	>ID527			Aas26_COI	KF888321			Aas15_16S	KF888293	Hap42	45.227N, 17.535E
Croatia: Vuka River, Razbojište	Vuka/Danube	Black Sea	>RAZB01	Ssh8	Lshm7			MW726456					45.438N, 18.258E
Croatia: Vuka River, Razbojište	Vuka/Danube	Black Sea	>RAZB02	Ssh8	Lshm7			MW726455					45.438N, 18.258E
Croatia: Vuka River, Razbojište	Vuka/Danube	Black Sea	>RAZB03	Ssh8	Lshm7			MW726454					45.438N, 18.258E
Croatia: Vuka River, Razbojište	Vuka/Danube	Black Sea	>RAZB04	Ssh8	Lshm7			MW726453					45.438N, 18.258E
Croatia: Vuka River, Razbojište	Vuka/Danube	Black Sea	>RAZB05	Ssh8	Lshm7			MW726452					45.438N, 18.258E
Croatia: Vuka River, Razbojište	Vuka/Danube	Black Sea	>RAZB06	Ssh8	Lshm7			MW726451					45.438N, 18.258E
Croatia: Vuka River, Razbojište	Vuka/Danube	Black Sea	>RAZB07	Ssh8	Lshm7			MW726450					45.438N, 18.258E
Croatia: Vuka River, Razbojište	Vuka/Danube	Black Sea	>RAZB08	Ssh8	Lshm7			MW726449					45.438N, 18.258E
Croatia: Vuka River, Razbojište	Vuka/Danube	Black Sea	>RAZB13	Ssh8	Lshm7			MW726448					45.438N, 18.258E
Croatia: Vuka River, Razbojište	Vuka/Danube	Black Sea	>RAZB14	Ssh8	Lshm7			MW726447					45.438N, 18.258E
Croatia: Vuka River, Razbojište	Vuka/Danube	Black Sea	>RAZB15	Ssh8	Lshm7			MW726446					45.438N, 18.258E
Croatia: Vuka River, Razbojište	Vuka/Danube	Black Sea	>RAZB17	Ssh8	Lshm7			MW726445					45.438N, 18.258E
Croatia: Vuka River, Razbojište	Vuka/Danube	Black Sea	>RAZB18	Ssh8	Lshm7			MW726444					45.438N, 18.258E
Croatia: Vuka River, Razbojište	Vuka/Danube	Black Sea	>RAZB19	Ssh8	Lshm7			MW726443					45.438N, 18.258E
Croatia: Vuka River, Razbojište	Vuka/Danube	Black Sea	>RAZB20	Ssh8	Lshm7			MW726442					45.438N, 18.258E
Croatia: Vuka River, Razbojište	Vuka/Danube	Black Sea	>RAZB21	Ssh8	Lshm7			MW726441					45.438N, 18.258E
Czech Republic: Kramata	Elbe	North Sea	>ID144			Aas01_COI	KF888296			Aas01_16S	KF888279	Hap01	49.043N, 13.758E
Czech Republic: Kramata	Elbe	North Sea	>ID145			Aas01_COI	KF888296			Aas01_16S	KF888279	Hap01	49.043N, 13.758E
Czech Republic: Kramata	Elbe	North Sea	>ID146			Aas01_COI	KF888296			Aas01_16S	KF888279	Hap01	49.043N, 13.758E
Czech Republic: Kramata	Elbe	North Sea	>ID147			Aas01_COI	KF888296			Aas01_16S	KF888279	Hap01	49.043N, 13.758E
Czech Republic: Kramata	Elbe	North Sea	>ID148			Aas01_COI	KF888296			Aas01_16S	KF888279	Hap01	49.043N, 13.758E
Czech Republic: Kramata	Elbe	North Sea	>ID149			Aas01_COI	KF888296			Aas01_16S	KF888279	Hap01	49.043N, 13.758E
Czech Republic: Kramata	Elbe	North Sea	>ID150			Aas01_COI	KF888296			Aas01_16S	KF888279	Hap01	49.043N, 13.758E
Czech Republic: Svetlohor	Elbe	North Sea	>ID130			Aas01_COI	KF888296			Aas01_16S	KF888279	Hap01	48.977N, 13.736E
Czech Republic: Svetlohor	Elbe	North Sea	>ID131			Aas01_COI	KF888296			Aas01_16S	KF888279	Hap01	48.977N, 13.736E
Czech Republic: Svetlohor	Elbe	North Sea	>ID132			Aas01_COI	KF888296			Aas01_16S	KF888279	Hap01	48.977N, 13.736E
Czech Republic: Svetlohor	Elbe	North Sea	>ID133			Aas01_COI	KF888296			Aas01_16S	KF888279	Hap01	48.977N, 13.736E
Czech Republic: Svetlohor	Elbe	North Sea	>ID134			Aas01_COI	KF888296			Aas01_16S	KF888279	Hap01	48.977N, 13.736E
Czech Republic: Svetlohor	Elbe	North Sea	>ID135			Aas01_COI	KF888296			Aas01_16S	KF888279	Hap01	48.977N, 13.736E
Czech Republic: Svetlohor	Elbe	North Sea	>ID136			Aas01_COI	KF888296			Aas01_16S	KF888279	Hap01	48.977N, 13.736E
Czech Republic: Svetlohor	Elbe	North Sea	>ID137			Aas01_COI	KF888296			Aas01_16S	KF888279	Hap01	48.977N, 13.736E
Czech Republic: U sudu	Elbe	North Sea	>ID138			Aas01_COI	KF888296			Aas01_16S	KF888279	Hap01	49.822N, 15.358E
Czech Republic: U sudu	Elbe	North Sea	>ID139			Aas01_COI	KF888296			Aas01_16S	KF888279	Hap01	49.822N, 15.358E
Czech Republic: U sudu	Elbe	North Sea	>ID140			Aas01_COI	KF888296			Aas01_16S	KF888279	Hap01	49.822N, 15.358E
Czech Republic: U sudu	Elbe	North Sea	>ID141			Aas01_COI	KF888296			Aas01_16S	KF888279	Hap01	49.822N, 15.358E
Czech Republic: U sudu	Elbe	North Sea	>ID142			Aas18_COI	KF888313			Aas08_16S	KF888286	Hap25	49.822N, 15.358E
Czech Republic: U sudu	Elbe	North Sea	>ID143			Aas18_COI	KF888313			Aas08_16S	KF888286	Hap25	49.822N, 15.358E
Estonia: Lake Pangodi	Lake Pangodi	Baltic Sea	>PAN16_23	Ssh2	Lshm2			MW726347					n/a
Estonia: Lake Pangodi	Lake Pangodi	Baltic Sea	>PAN16_24	Ssh2	Lshm2			MW726346					n/a
Estonia: Lake Pangodi	Lake Pangodi	Baltic Sea	>PAN16_25	Ssh2	Lshm2			MW726345					n/a
Estonia: Lake Pangodi	Lake Pangodi	Baltic Sea	>PAN16_26	Ssh2	Lshm2			MW726344					n/a
Estonia: Lake Pangodi	Lake Pangodi	Baltic Sea	>PAN16_27	Ssh2	Lshm2			MW726343					n/a
Estonia: Lake Pangodi	Lake Pangodi	Baltic Sea	>PAN16_28	Ssh2	Lshm2			MW726342					n/a
Estonia: Lake Pangodi	Lake Pangodi	Baltic Sea	>PAN16_29	Ssh2	Lshm2			MW726341					n/a
Estonia: Lake Pangodi	Lake Pangodi	Baltic Sea	>PAN16_30	Ssh2	Lshm2			MW726340					n/a
Estonia: Lake Pangodi	Lake Pangodi	Baltic Sea	>PAN16_31	Ssh2	Lshm2			MW726339					n/a
Estonia: Lake Pangodi	Lake Pangodi	Baltic Sea	>PAN16_32	Ssh2	Lshm2			MW726338					n/a
Estonia: Oju River	Oju	Baltic Sea	>OJU13_18	Ssh2	Lshm2			MW726357					n/a
Estonia: Oju River	Oju	Baltic Sea	>OJU13_19	Ssh2	Lshm2			MW726356					n/a
Estonia: Oju River	Oju	Baltic Sea	>OJU13_20	Ssh2	Lshm2			MW726355					n/a
Estonia: Oju River	Oju	Baltic Sea	>OJU13_21	Ssh2	Lshm2			MW726354					n/a
Estonia: Oju River	Oju	Baltic Sea	>OJU13_22	Ssh2	Lshm2			MW726353					n/a
Estonia: Oju River	Oju	Baltic Sea	>OJU13_23	Ssh2	Lshm2			MW726352					n/a
Estonia: Oju River	Oju	Baltic Sea	>OJU13_24	Ssh2	Lshm2			MW726351					n/a
Estonia: Oju River	Oju	Baltic Sea	>OJU13_25	Ssh2	Lshm2			MW726350					n/a
Estonia: Oju River	Oju	Baltic Sea	>OJU13_26	Ssh2	Lshm2			MW726349					n/a
Estonia: Oju River	Oju	Baltic Sea	>OJU13_27	Ssh2	Lshm2			MW726348					n/a
Finland: Valkeinen	Kymenjoki	Baltic Sea	>ID88			Aas01_COI	KF888296			Aas01_16S	KF888279	Hap01	n/a
Finland: Valkeinen	Kymenjoki	Baltic Sea	>ID89			Aas01_COI	KF888296			Aas01_16S	KF888279	Hap01	n/a
Finland: Valkeinen	Kymenjoki	Baltic Sea	>ID90			Aas01_COI	KF888296			Aas01_16S	KF888279	Hap01	n/a
Finland: Valkeinen	Kymenjoki	Baltic Sea	>ID91			Aas01_COI	KF888296			Aas03_16S	KF888281	Hap07	n/a
Finland: Valkeinen	Kymenjoki	Baltic Sea	>ID92			Aas01_COI	KF888296			Aas03_16S	KF888281	Hap07	n/a
Finland: Yla	Kokemäenjoki	Baltic Sea	>ID93			Aas01_COI	KF888296			Aas01_16S	KF888279	Hap01	n/a
Finland: Yla	Kokemäenjoki	Baltic Sea	>ID94			Aas01_COI	KF888296			Aas01_16S	KF888279	Hap01	n/a
Finland: Yla	Kokemäenjoki	Baltic Sea	>ID95			Aas01_COI	KF888296			Aas01_16S	KF888279	Hap01	n/a
Finland: Yla	Kokemäenjoki	Baltic Sea	>ID96			Aas01_COI	KF888296			Aas01_16S	KF888279	Hap01	n/a
Finland: Yla	Kokemäenjoki	Baltic Sea	>ID97			Aas01_COI	KF888296			Aas01_16S	KF888279	Hap01	n/a
Germany: Aar	Rhine	North Sea	>ID160			Aas01_COI	KF888296			Aas01_16S	KF888279	Hap01	50.675N, 8.487E
Germany: Aar	Rhine	North Sea	>ID161			Aas01_COI	KF888296			Aas01_16S	KF888279	Hap01	50.675N, 8.487E
Germany: Aar	Rhine	North Sea	>ID162			Aas01_COI	KF888296			Aas01_16S	KF888279	Hap01	50.675N, 8.487E
Germany: Aar	Rhine	North Sea	>ID163			Aas01_COI	KF888296			Aas01_16S	KF888279	Hap01	50.675N, 8.487E
Germany: Aar	Rhine	North Sea	>ID164			Aas01_COI	KF888296			Aas01_16S	KF888279	Hap01	50.675N, 8.487E
Germany: Allna	Rhine	North Sea	>ID165			Aas01_COI	KF888296			Aas01_16S	KF888279	Hap01	50.791N, 8.591E
Germany: Allna	Rhine	North Sea	>ID166			Aas01_COI	KF888296			Aas01_16S	KF888279	Hap01	50.791N, 8.591E
Germany: Allna	Rhine	North Sea	>ID167			Aas01_COI	KF888296			Aas01_16S	KF888279	Hap01	50.791N, 8.591E
Germany: Allna	Rhine	North Sea	>ID168			Aas01_COI	KF888296			Aas07_16S	KF888285	Hap21	50.791N, 8.591E
Germany: Ambach	Rhine	North Sea	>ID169			Aas01_COI	KF888296			Aas01_16S	KF888279	Hap01	50.702N, 8.275E
Germany: Ambach	Rhine	North Sea	>ID170			Aas01_COI	KF888296			Aas01_16S	KF888279	Hap01	50.702N, 8.275E
Germany: Ambach	Rhine	North Sea	>ID171			Aas01_COI	KF888296			Aas01_16S	KF888279	Hap01	50.702N, 8.275E
Germany: Ambach	Rhine	North Sea	>ID172			Aas01_COI	KF888296			Aas01_16S	KF888279	Hap01	50.702N, 8.275E
Germany: Ambach	Rhine	North Sea	>ID173			Aas01_COI	KF888296			Aas01_16S	KF888279	Hap01	50.702N, 8.275E
Germany: Barthe	German Baltic Sea estuary	Baltic Sea	>ID35			Aas12_COI	KF888307			Aas01_16S	KF888279	Hap16	54.333N, 12.833E
Germany: Barthe	German Baltic Sea estuary	Baltic Sea	>ID36			Aas12_COI	KF888307			Aas01_16S	KF888279	Hap16	54.333N, 12.833E
Germany: Barthe	German Baltic Sea estuary	Baltic Sea	>ID37			Aas12_COI	KF888307			Aas01_16S	KF888279	Hap16	54.333N, 12.833E
Germany: Barthe	German Baltic Sea estuary	Baltic Sea	>ID38			Aas12_COI	KF888307			Aas01_16S	KF888279	Hap16	54.333N, 12.833E
Germany: Barthe	German Baltic Sea estuary	Baltic Sea	>ID39			Aas12_COI	KF888307			Aas01_16S	KF888279	Hap16	54.333N, 12.833E
Germany: Breitweiher/Rhön	Weser	North Sea	>ID336			Aas01_COI	KF888296			Aas01_16S	KF888279	Hap01	50.507N, 9.730E
Germany: Breitweiher/Rhön	Weser	North Sea	>ID337			Aas01_COI	KF888296			Aas01_16S	KF888279	Hap01	50.507N, 9.730E
Germany: Clausthal-Zellerfeld*	Weser	North Sea	>ID31			Aas01_COI	JN254659						51.809N, 10.352E
Germany: Dautphe	Rhine	North Sea	>ID177			Aas01_COI	KF888296			Aas01_16S	KF888279	Hap01	50.838N, 8.525E
Germany: Dautphe	Rhine	North Sea	>ID178			Aas01_COI	KF888296			Aas01_16S	KF888279	Hap01	50.838N, 8.525E
Germany: Dautphe	Rhine	North Sea	>ID179			Aas01_COI	KF888296			Aas01_16S	KF888279	Hap01	50.838N, 8.525E
Germany: Dautphe	Rhine	North Sea	>ID180			Aas01_COI	KF888296			Aas01_16S	KF888279	Hap01	50.838N, 8.525E
Germany: Dielbach (Woog)	Rhine	North Sea	>ID181			Aas01_COI	KF888296			Aas01_16S	KF888279	Hap01	49.114N, 7.655E
Germany: Dielbach (Woog)	Rhine	North Sea	>ID182			Aas01_COI	KF888296			Aas01_16S	KF888279	Hap01	49.114N, 7.655E
Germany: Dielbach (Woog)	Rhine	North Sea	>ID183			Aas01_COI	KF888296			Aas01_16S	KF888279	Hap01	49.114N, 7.655E
Germany: Dielbach (Woog)	Rhine	North Sea	>ID184			Aas04_COI	KF888299			Aas01_16S	KF888279	Hap05	49.114N, 7.655E
Germany: Dielbach (Woog)	Rhine	North Sea	>ID185			Aas21_COI	KF888316			Aas01_16S	KF888279	Hap31	49.114N, 7.655E
Germany: Dielbach (Woog)	Rhine	North Sea	>ID186			Aas21_COI	KF888316			Aas01_16S	KF888279	Hap31	49.114N, 7.655E
Germany: Dielbach (Woog)	Rhine	North Sea	>ID187			Aas21_COI	KF888316			Aas01_16S	KF888279	Hap31	49.114N, 7.655E
Germany: Dielbach (Woog)	Rhine	North Sea	>ID188			Aas26_COI	KF888321			Aas14_16S	KF888292	Hap41	49.114N, 7.655E
Germany: Donsbach	Rhine	North Sea	>ID189			Aas01_COI	KF888296			Aas01_16S	KF888279	Hap01	50.708N, 8.242E
Germany: Donsbach	Rhine	North Sea	>ID190			Aas01_COI	KF888296			Aas01_16S	KF888279	Hap01	50.708N, 8.242E
Germany: Donsbach	Rhine	North Sea	>ID191			Aas01_COI	KF888296			Aas01_16S	KF888279	Hap01	50.708N, 8.242E
Germany: Donsbach	Rhine	North Sea	>ID192			Aas01_COI	KF888296			Aas01_16S	KF888279	Hap01	50.708N, 8.242E
Germany: Donsbach	Rhine	North Sea	>ID193			Aas01_COI	KF888296			Aas01_16S	KF888279	Hap01	50.708N, 8.242E
Germany: Eichelbach	Rhine	North Sea	>ID194			Aas01_COI	KF888296			Aas01_16S	KF888279	Hap01	50.459N, 9.123E
Germany: Eichelbach	Rhine	North Sea	>ID195			Aas01_COI	KF888296			Aas01_16S	KF888279	Hap01	50.459N, 9.123E
Germany: Eichelbach	Rhine	North Sea	>ID196			Aas01_COI	KF888296			Aas01_16S	KF888279	Hap01	50.459N, 9.123E
Germany: Eichelbach	Rhine	North Sea	>ID197			Aas01_COI	KF888296			Aas01_16S	KF888279	Hap01	50.459N, 9.123E
Germany: Eichelbach	Rhine	North Sea	>ID198			Aas01_COI	KF888296			Aas01_16S	KF888279	Hap01	50.459N, 9.123E
Germany: Eifel	Rhine	North Sea	>ID313			Aas01_COI	KF888296			Aas01_16S	KF888279	Hap01	50.249N, 6.667E
Germany: Eifel	Rhine	North Sea	>ID314			Aas20_COI	KF888315			Aas03_16S	KF888281	Hap32	50.249N, 6.667E
Germany: Farm Augsburg	Hatchery/Danube	Black Sea	>ID556			Aas01_COI	KF888296			Aas01_16S	KF888279	Hap01	48.359N, 10.906E
Germany: Farm Augsburg	Hatchery/Danube	Black Sea	>ID557			Aas01_COI	KF888296			Aas01_16S	KF888279	Hap01	48.359N, 10.906E
Germany: Farm Augsburg	Hatchery/Danube	Black Sea	>ID558			Aas01_COI	KF888296			Aas01_16S	KF888279	Hap01	48.359N, 10.906E
Germany: Farm Augsburg	Hatchery/Danube	Black Sea	>ID559			Aas01_COI	KF888296			Aas01_16S	KF888279	Hap01	48.359N, 10.906E
Germany: Farm Augsburg	Hatchery/Danube	Black Sea	>ID560			Aas01_COI	KF888296			Aas01_16S	KF888279	Hap01	48.359N, 10.906E
Germany: Farm Augsburg	Hatchery/Danube	Black Sea	>ID561			Aas01_COI	KF888296			Aas01_16S	KF888279	Hap01	48.359N, 10.906E
Germany: Farm Augsburg	Hatchery/Danube	Black Sea	>ID562			Aas01_COI	KF888296			Aas01_16S	KF888279	Hap01	48.359N, 10.906E
Germany: Farm Augsburg	Hatchery/Danube	Black Sea	>ID563			Aas01_COI	KF888296			Aas01_16S	KF888279	Hap01	48.359N, 10.906E
Germany: Farm Augsburg	Hatchery/Danube	Black Sea	>ID564			Aas05_COI	KF888300			Aas01_16S	KF888279	Hap06	48.359N, 10.906E
Germany: Farm Augsburg	Hatchery/Danube	Black Sea	>ID565			Aas05_COI	KF888300			Aas01_16S	KF888279	Hap06	48.359N, 10.906E
Germany: Farm Augsburg	Hatchery/Danube	Black Sea	>ID566			Aas05_COI	KF888300			Aas01_16S	KF888279	Hap06	48.359N, 10.906E
Germany: Farm Augsburg	Hatchery/Danube	Black Sea	>ID567			Aas01_COI	KF888296			Aas03_16S	KF888281	Hap07	48.359N, 10.906E
Germany: Farm Augsburg	Hatchery/Danube	Black Sea	>ID568			Aas06_COI	KF888301			Aas01_16S	KF888279	Hap08	48.359N, 10.906E
Germany: Farm Augsburg	Hatchery/Danube	Black Sea	>ID569			Aas20_COI	KF888315			Aas03_16S	KF888281	Hap32	48.359N, 10.906E
Germany: Farm Augsburg	Hatchery/Danube	Black Sea	>ID570			Aas20_COI	KF888315			Aas03_16S	KF888281	Hap32	48.359N, 10.906E
Germany: Farm Oeversee	Hatchery/Elbe	North Sea	>ID551			Aas02_COI	KF888297			Aas01_16S	KF888279	Hap03	54.688N, 9.422E
Germany: Farm Oeversee	Hatchery/Elbe	North Sea	>ID552			Aas02_COI	KF888297			Aas01_16S	KF888279	Hap03	54.688N, 9.422E
Germany: Farm Oeversee	Hatchery/Elbe	North Sea	>ID553			Aas02_COI	KF888297			Aas01_16S	KF888279	Hap03	54.688N, 9.422E
Germany: Farm Oeversee	Hatchery/Elbe	North Sea	>ID554			Aas02_COI	KF888297			Aas01_16S	KF888279	Hap03	54.688N, 9.422E
Germany: Farm Oeversee	Hatchery/Elbe	North Sea	>ID555			Aas03_COI	KF888298			Aas01_16S	KF888279	Hap04	54.688N, 9.422E
Germany: Fischbach	Rhine	North Sea	>ID199			Aas01_COI	KF888296			Aas01_16S	KF888279	Hap01	49.087N, 7.674E
Germany: Fischbach	Rhine	North Sea	>ID200			Aas01_COI	KF888296			Aas01_16S	KF888279	Hap01	49.087N, 7.674E
Germany: Fischbach	Rhine	North Sea	>ID201			Aas01_COI	KF888296			Aas01_16S	KF888279	Hap01	49.087N, 7.674E
Germany: Fischbach	Rhine	North Sea	>ID202			Aas22_COI	KF888317			Aas01_16S	KF888279	Hap30	49.087N, 7.674E
Germany: Fischbach	Rhine	North Sea	>ID203			Aas22_COI	KF888317			Aas01_16S	KF888279	Hap30	49.087N, 7.674E
Germany: Fischbach	Rhine	North Sea	>ID204			Aas22_COI	KF888317			Aas01_16S	KF888279	Hap30	49.087N, 7.674E
Germany: Fohnbach	Rhine	North Sea	>ID205			Aas01_COI	KF888296			Aas01_16S	KF888279	Hap01	50.636N, 8.622E
Germany: Fohnbach	Rhine	North Sea	>ID206			Aas01_COI	KF888296			Aas01_16S	KF888279	Hap01	50.636N, 8.622E
Germany: Fohnbach	Rhine	North Sea	>ID207			Aas01_COI	KF888296			Aas01_16S	KF888279	Hap01	50.636N, 8.622E
Germany: Fohnbach	Rhine	North Sea	>ID208			Aas01_COI	KF888296			Aas01_16S	KF888279	Hap01	50.636N, 8.622E
Germany: Fohnbach	Rhine	North Sea	>ID209			Aas01_COI	KF888296			Aas01_16S	KF888279	Hap01	50.636N, 8.622E
Germany: Gansbach	Rhine	North Sea	>ID211			Aas01_COI	KF888296			Aas01_16S	KF888279	Hap01	50.804N, 8.409E
Germany: Gansbach	Rhine	North Sea	>ID212			Aas01_COI	KF888296			Aas01_16S	KF888279	Hap01	50.804N, 8.409E
Germany: Gansbach	Rhine	North Sea	>ID213			Aas01_COI	KF888296			Aas01_16S	KF888279	Hap01	50.804N, 8.409E
Germany: Gansbach	Rhine	North Sea	>ID214			Aas01_COI	KF888296			Aas01_16S	KF888279	Hap01	50.804N, 8.409E
Germany: Gansbach	Rhine	North Sea	>ID215			Aas01_COI	KF888296			Aas01_16S	KF888279	Hap01	50.804N, 8.409E
Germany: Geierstein/Roth	Rhine	North Sea	>ID216			Aas01_COI	KF888296			Aas01_16S	KF888279	Hap01	50.641N, 8.226E
Germany: Geierstein/Roth	Rhine	North Sea	>ID217			Aas01_COI	KF888296			Aas01_16S	KF888279	Hap01	50.641N, 8.226E
Germany: Geierstein/Roth	Rhine	North Sea	>ID218			Aas01_COI	KF888296			Aas01_16S	KF888279	Hap01	50.641N, 8.226E
Germany: Geierstein/Roth	Rhine	North Sea	>ID219			Aas01_COI	KF888296			Aas01_16S	KF888279	Hap01	50.641N, 8.226E
Germany: Geierstein/Roth	Rhine	North Sea	>ID220			Aas01_COI	KF888296			Aas01_16S	KF888279	Hap01	50.641N, 8.226E
Germany: Geierstein/Roth	Rhine	North Sea	>ID221			Aas01_COI	KF888296			Aas01_16S	KF888279	Hap01	50.641N, 8.226E
Germany: Geierstein/Roth	Rhine	North Sea	>ID222			Aas01_COI	KF888296			Aas01_16S	KF888279	Hap01	50.641N, 8.226E
Germany: Geierstein/Roth	Rhine	North Sea	>ID223			Aas01_COI	KF888296			Aas01_16S	KF888279	Hap01	50.641N, 8.226E
Germany: Geierstein/Roth	Rhine	North Sea	>ID224			Aas01_COI	KF888296			Aas01_16S	KF888279	Hap01	50.641N, 8.226E
Germany: Geierstein/Roth	Rhine	North Sea	>ID225			Aas01_COI	KF888296			Aas01_16S	KF888279	Hap01	50.641N, 8.226E
Germany: Giebelsbach	Rhine	North Sea	>ID210			Aas01_COI	KF888296			Aas01_16S	KF888279	Hap01	50.997N, 9.012E
Germany: Gut Rietberg	Ems	North Sea	>ID98			Aas01_COI	KF888296			Aas01_16S	KF888279	Hap01	51.802N, 8.435E
Germany: Gut Rietberg	Ems	North Sea	>ID99			Aas01_COI	KF888296			Aas01_16S	KF888279	Hap01	51.802N, 8.435E
Germany: Gut Rietberg	Ems	North Sea	>ID100			Aas01_COI	KF888296			Aas01_16S	KF888279	Hap01	51.802N, 8.435E
Germany: Gut Rietberg	Ems	North Sea	>ID101			Aas01_COI	KF888296			Aas01_16S	KF888279	Hap01	51.802N, 8.435E
Germany: Gut Rietberg	Ems	North Sea	>ID102			Aas20_COI	KF888315			Aas03_16S	KF888281	Hap32	51.802N, 8.435E
Germany: Hartmann/Rehbach	Rhine	North Sea	>ID275			Aas01_COI	KF888296			Aas01_16S	KF888279	Hap01	50.624N, 8.120E
Germany: Hartmann/Rehbach	Rhine	North Sea	>ID276			Aas01_COI	KF888296			Aas01_16S	KF888279	Hap01	50.624N, 8.120E
Germany: Hartmann/Rehbach	Rhine	North Sea	>ID277			Aas01_COI	KF888296			Aas01_16S	KF888279	Hap01	50.624N, 8.120E
Germany: Hartmann/Rehbach	Rhine	North Sea	>ID278			Aas01_COI	KF888296			Aas01_16S	KF888279	Hap01	50.624N, 8.120E
Germany: Hartmann/Rehbach	Rhine	North Sea	>ID279			Aas01_COI	KF888296			Aas01_16S	KF888279	Hap01	50.624N, 8.120E
Germany: Jäglitz	Elbe	North Sea	>ID123			Aas01_COI	KF888296			Aas01_16S	KF888279	Hap01	52.960N, 12.741E
Germany: Jäglitz	Elbe	North Sea	>ID124			Aas01_COI	KF888296			Aas01_16S	KF888279	Hap01	52.960N, 12.741E
Germany: Jäglitz	Elbe	North Sea	>ID125			Aas01_COI	KF888296			Aas01_16S	KF888279	Hap01	52.960N, 12.741E
Germany: Jäglitz	Elbe	North Sea	>ID126			Aas01_COI	KF888296			Aas01_16S	KF888279	Hap01	52.960N, 12.741E
Germany: Jäglitz	Elbe	North Sea	>ID127			Aas01_COI	KF888296			Aas01_16S	KF888279	Hap01	52.960N, 12.741E
Germany: Jäglitz	Elbe	North Sea	>ID128			Aas26_COI	KF888321			Aas14_16S	KF888292	Hap41	52.960N, 12.741E
Germany: Jäglitz	Elbe	North Sea	>ID129			Aas26_COI	KF888321			Aas14_16S	KF888292	Hap41	52.960N, 12.741E
Germany: Kallenbach	Rhine	North Sea	>ID231			Aas01_COI	KF888296			Aas01_16S	KF888279	Hap01	50.582N, 8.226E
Germany: Kallenbach	Rhine	North Sea	>ID232			Aas01_COI	KF888296			Aas01_16S	KF888279	Hap01	50.582N, 8.226E
Germany: Kallenbach	Rhine	North Sea	>ID233			Aas01_COI	KF888296			Aas01_16S	KF888279	Hap01	50.582N, 8.226E
Germany: Kallenbach	Rhine	North Sea	>ID234			Aas01_COI	KF888296			Aas01_16S	KF888279	Hap01	50.582N, 8.226E
Germany: Kallenbach	Rhine	North Sea	>ID235			Aas01_COI	KF888296			Aas01_16S	KF888279	Hap01	50.582N, 8.226E
Germany: Klausbach	Rhine	North Sea	>ID257			Aas01_COI	KF888296			Aas01_16S	KF888279	Hap01	52.272N, 7.910E
Germany: Klausbach	Rhine	North Sea	>ID258			Aas01_COI	KF888296			Aas01_16S	KF888279	Hap01	52.272N, 7.910E
Germany: Klausbach	Rhine	North Sea	>ID259			Aas01_COI	KF888296			Aas01_16S	KF888279	Hap01	52.272N, 7.910E
Germany: Klausbach	Rhine	North Sea	>ID260			Aas20_COI	KF888315			Aas03_16S	KF888281	Hap32	52.272N, 7.910E
Germany: Klausbach	Rhine	North Sea	>ID261			Aas20_COI	KF888315			Aas03_16S	KF888281	Hap32	52.272N, 7.910E
Germany: Klausbach	Rhine	North Sea	>ID262			Aas20_COI	KF888315			Aas03_16S	KF888281	Hap32	52.272N, 7.910E
Germany: Klausbach	Rhine	North Sea	>ID263			Aas20_COI	KF888315			Aas03_16S	KF888281	Hap32	52.272N, 7.910E
Germany: Koppelsee	Uecker	Baltic Sea	>ID32			Aas01_COI	KF888296			Aas01_16S	KF888279	Hap01	53.307N, 13.855E
Germany: Koppelsee	Uecker	Baltic Sea	>ID33			Aas01_COI	KF888296			Aas01_16S	KF888279	Hap01	53.307N, 13.855E
Germany: Koppelsee	Uecker	Baltic Sea	>ID34			Aas01_COI	KF888296			Aas01_16S	KF888279	Hap01	53.307N, 13.855E
Germany: Langsee	Eider	North Sea	>ID103			Aas02_COI	KF888297			Aas01_16S	KF888279	Hap03	54.575N, 9.593E
Germany: Langsee	Eider	North Sea	>ID104			Aas02_COI	KF888297			Aas01_16S	KF888279	Hap03	54.575N, 9.593E
Germany: Langsee	Eider	North Sea	>ID105			Aas02_COI	KF888297			Aas01_16S	KF888279	Hap03	54.575N, 9.593E
Germany: Langsee	Eider	North Sea	>ID106			Aas02_COI	KF888297			Aas01_16S	KF888279	Hap03	54.575N, 9.593E
Germany: Langsee	Eider	North Sea	>ID107			Aas02_COI	KF888297			Aas01_16S	KF888279	Hap03	54.575N, 9.593E
Germany: Langsee	Eider	North Sea	>ID108			Aas02_COI	KF888297			Aas01_16S	KF888279	Hap03	54.575N, 9.593E
Germany: Langsee	Eider	North Sea	>ID109			Aas02_COI	KF888297			Aas01_16S	KF888279	Hap03	54.575N, 9.593E
Germany: Langsee	Eider	North Sea	>ID110			Aas02_COI	KF888297			Aas01_16S	KF888279	Hap03	54.575N, 9.593E
Germany: Langsee	Eider	North Sea	>ID111			Aas03_COI	KF888298			Aas01_16S	KF888279	Hap04	54.575N, 9.593E
Germany: Lasterbach	Rhine	North Sea	>ID236			Aas01_COI	KF888296			Aas01_16S	KF888279	Hap01	50.591N, 8.142E
Germany: Lasterbach	Rhine	North Sea	>ID237			Aas01_COI	KF888296			Aas01_16S	KF888279	Hap01	50.591N, 8.142E
Germany: Lasterbach	Rhine	North Sea	>ID238			Aas01_COI	KF888296			Aas01_16S	KF888279	Hap01	50.591N, 8.142E
Germany: Lasterbach	Rhine	North Sea	>ID239			Aas01_COI	KF888296			Aas01_16S	KF888279	Hap01	50.591N, 8.142E
Germany: Lasterbach	Rhine	North Sea	>ID240			Aas01_COI	KF888296			Aas01_16S	KF888279	Hap01	50.591N, 8.142E
Germany: Madenmühlen	Rhine	North Sea	>ID247			Aas01_COI	KF888296			Aas01_16S	KF888279	Hap01	50.624N, 8.143E
Germany: Madenmühlen	Rhine	North Sea	>ID248			Aas01_COI	KF888296			Aas01_16S	KF888279	Hap01	50.624N, 8.143E
Germany: Madenmühlen	Rhine	North Sea	>ID249			Aas01_COI	KF888296			Aas01_16S	KF888279	Hap01	50.624N, 8.143E
Germany: Madenmühlen	Rhine	North Sea	>ID250			Aas01_COI	KF888296			Aas01_16S	KF888279	Hap01	50.624N, 8.143E
Germany: Madenmühlen	Rhine	North Sea	>ID251			Aas01_COI	KF888296			Aas01_16S	KF888279	Hap01	50.624N, 8.143E
Germany: Madenmühlen 2	Rhine	North Sea	>ID252			Aas01_COI	KF888296			Aas01_16S	KF888279	Hap01	50.624N, 8.143E
Germany: Madenmühlen 2	Rhine	North Sea	>ID253			Aas01_COI	KF888296			Aas01_16S	KF888279	Hap01	50.624N, 8.143E
Germany: Madenmühlen 2	Rhine	North Sea	>ID254			Aas01_COI	KF888296			Aas01_16S	KF888279	Hap01	50.624N, 8.143E
Germany: Madenmühlen 2	Rhine	North Sea	>ID255			Aas01_COI	KF888296			Aas01_16S	KF888279	Hap01	50.624N, 8.143E
Germany: Mahlscheid	Rhine	North Sea	>ID264			Aas01_COI	KF888296			Aas01_16S	KF888279	Hap01	50.778N, 7.972E
Germany: Mahlscheid	Rhine	North Sea	>ID265			Aas01_COI	KF888296			Aas01_16S	KF888279	Hap01	50.778N, 7.972E
Germany: Mahlscheid	Rhine	North Sea	>ID266			Aas01_COI	KF888296			Aas01_16S	KF888279	Hap01	50.778N, 7.972E
Germany: Mahlscheid	Rhine	North Sea	>ID267			Aas01_COI	KF888296			Aas01_16S	KF888279	Hap01	50.778N, 7.972E
Germany: Mahlscheid	Rhine	North Sea	>ID268			Aas01_COI	KF888296			Aas01_16S	KF888279	Hap01	50.778N, 7.972E
Germany: Mahlscheid	Rhine	North Sea	>ID269			Aas01_COI	KF888296			Aas01_16S	KF888279	Hap01	50.778N, 7.972E
Germany: Meerbach	Rhine	North Sea	>ID246			Aas01_COI	KF888296			Aas01_16S	KF888279	Hap01	50.706N, 8.482E
Germany: Meisertalweiher	Rhine	North Sea	>ID293			Aas01_COI	KF888296			Aas01_16S	KF888279	Hap01	49.335N, 7.769E
Germany: Meisertalweiher	Rhine	North Sea	>ID294			Aas01_COI	KF888296			Aas01_16S	KF888279	Hap01	49.335N, 7.769E
Germany: Meisertalweiher	Rhine	North Sea	>ID295			Aas01_COI	KF888296			Aas01_16S	KF888279	Hap01	49.335N, 7.769E
Germany: Meisertalweiher	Rhine	North Sea	>ID296			Aas01_COI	KF888296			Aas01_16S	KF888279	Hap01	49.335N, 7.769E
Germany: Meisertalweiher	Rhine	North Sea	>ID297			Aas01_COI	KF888296			Aas01_16S	KF888279	Hap01	49.335N, 7.769E
Germany: Merzkrebse	Rhine	North Sea	>ID241			Aas01_COI	KF888296			Aas01_16S	KF888279	Hap01	50.336N, 7.976E
Germany: Merzkrebse	Rhine	North Sea	>ID242			Aas01_COI	KF888296			Aas01_16S	KF888279	Hap01	50.336N, 7.976E
Germany: Merzkrebse	Rhine	North Sea	>ID243			Aas01_COI	KF888296			Aas01_16S	KF888279	Hap01	50.336N, 7.976E
Germany: Merzkrebse	Rhine	North Sea	>ID244			Aas01_COI	KF888296			Aas01_16S	KF888279	Hap01	50.336N, 7.976E
Germany: Merzkrebse	Rhine	North Sea	>ID245			Aas01_COI	KF888296			Aas01_16S	KF888279	Hap01	50.336N, 7.976E
Germany: Mühlgraben Caldern	Rhine	North Sea	>ID174			Aas01_COI	KF888296			Aas01_16S	KF888279	Hap01	50.842N, 8.658E
Germany: Mühlgraben Caldern	Rhine	North Sea	>ID175			Aas01_COI	KF888296			Aas01_16S	KF888279	Hap01	50.842N, 8.658E
Germany: Mühlgraben Caldern	Rhine	North Sea	>ID176			Aas05_COI	KF888300			Aas01_16S	KF888279	Hap06	50.842N, 8.658E
Germany: Nanzenbach	Rhine	North Sea	>ID256			Aas01_COI	KF888296			Aas01_16S	KF888279	Hap01	50.780N, 8.489E
Germany: Ocherbach	Weser	North Sea	>ID338			Aas01_COI	KF888296			Aas01_16S	KF888279	Hap01	50.673N, 9.185E
Germany: Ocherbach	Weser	North Sea	>ID339			Aas01_COI	KF888296			Aas01_16S	KF888279	Hap01	50.673N, 9.185E
Germany: Ocherbach	Weser	North Sea	>ID340			Aas01_COI	KF888296			Aas01_16S	KF888279	Hap01	50.673N, 9.185E
Germany: Ocherbach	Weser	North Sea	>ID341			Aas01_COI	KF888296			Aas01_16S	KF888279	Hap01	50.673N, 9.185E
Germany: Ocherbach	Weser	North Sea	>ID342			Aas01_COI	KF888296			Aas01_16S	KF888279	Hap01	50.673N, 9.185E
Germany: Perf	Rhine	North Sea	>ID270			Aas01_COI	KF888296			Aas01_16S	KF888279	Hap01	50.873N, 8.459E
Germany: Perf	Rhine	North Sea	>ID271			Aas01_COI	KF888296			Aas01_16S	KF888279	Hap01	50.873N, 8.459E
Germany: Perf	Rhine	North Sea	>ID272			Aas01_COI	KF888296			Aas01_16S	KF888279	Hap01	50.873N, 8.459E
Germany: Perf	Rhine	North Sea	>ID273			Aas01_COI	KF888296			Aas01_16S	KF888279	Hap01	50.873N, 8.459E
Germany: Perf	Rhine	North Sea	>ID274			Aas01_COI	KF888296			Aas01_16S	KF888279	Hap01	50.873N, 8.459E
Germany: Pollichia Woog	Rhine	North Sea	>ID280			Aas20_COI	KF888315			Aas03_16S	KF888281	Hap32	49.103N, 7.719E
Germany: Pollichia Woog	Rhine	North Sea	>ID281			Aas20_COI	KF888315			Aas03_16S	KF888281	Hap32	49.103N, 7.719E
Germany: Pollichia Woog2	Rhine	North Sea	>ID282			Aas01_COI	KF888296			Aas01_16S	KF888279	Hap01	49.103N, 7.719E
Germany: Pollichia Woog2	Rhine	North Sea	>ID283			Aas20_COI	KF888315			Aas03_16S	KF888281	Hap32	49.103N, 7.719E
Germany: Pollichia Woog2	Rhine	North Sea	>ID284			Aas20_COI	KF888315			Aas03_16S	KF888281	Hap32	49.103N, 7.719E
Germany: Saarbach (Lagerweiher)	Rhine	North Sea	>ID298			Aas01_COI	KF888296			Aas01_16S	KF888279	Hap01	49.084N, 7.685E
Germany: Saarbach (Woog)	Rhine	North Sea	>ID303			Aas01_COI	KF888296			Aas01_16S	KF888279	Hap01	49.084N, 7.671E
Germany: Saarbach (Woog)	Rhine	North Sea	>ID304			Aas01_COI	KF888296			Aas01_16S	KF888279	Hap01	49.084N, 7.671E
Germany: Saarbach (Woog)	Rhine	North Sea	>ID305			Aas01_COI	KF888296			Aas01_16S	KF888279	Hap01	49.084N, 7.671E
Germany: Saarbach (Woog)	Rhine	North Sea	>ID306			Aas01_COI	KF888296			Aas01_16S	KF888279	Hap01	49.084N, 7.671E
Germany: Saarbach (Woog)	Rhine	North Sea	>ID307			Aas21_COI	KF888316			Aas01_16S	KF888279	Hap31	49.084N, 7.671E
Germany: Saarbach/Saar-bachhammer	Rhine	North Sea	>ID301			Aas21_COI	KF888316			Aas01_16S	KF888279	Hap31	49.084N, 7.685E
Germany: Saarbach/Saar-bachhammer	Rhine	North Sea	>ID302			Aas21_COI	KF888316			Aas01_16S	KF888279	Hap31	49.084N, 7.685E
Germany: Saarbacher Hammer	Rhine	North Sea	>ID315			Aas21_COI	KF888316			Aas01_16S	KF888279	Hap31	49.084N, 7.685E
Germany: Saarbacher Mühlweiher	Rhine	North Sea	>ID299			Aas21_COI	KF888316			Aas01_16S	KF888279	Hap31	49.084N, 7.685E
Germany: Saarbacher Mühlweiher	Rhine	North Sea	>ID300			Aas21_COI	KF888316			Aas01_16S	KF888279	Hap31	49.084N, 7.685E
Germany: Salzbach	Rhine	North Sea	>ID308			Aas01_COI	KF888296			Aas01_16S	KF888279	Hap01	50.753N, 8.539E
Germany: Salzbach	Rhine	North Sea	>ID309			Aas01_COI	KF888296			Aas01_16S	KF888279	Hap01	50.753N, 8.539E
Germany: Salzbach	Rhine	North Sea	>ID310			Aas01_COI	KF888296			Aas01_16S	KF888279	Hap01	50.753N, 8.539E
Germany: Salzbach	Rhine	North Sea	>ID311			Aas01_COI	KF888296			Aas01_16S	KF888279	Hap01	50.753N, 8.539E
Germany: Salzbach	Rhine	North Sea	>ID312			Aas01_COI	KF888296			Aas01_16S	KF888279	Hap01	50.753N, 8.539E
Germany: Schlettenbachtal	Rhine	North Sea	>ID285			Aas20_COI	KF888315			Aas03_16S	KF888281	Hap32	49.088N, 7.711E
Germany: Schwarze Elster	Elbe	North Sea	>ID117			Aas01_COI	KF888296			Aas01_16S	KF888279	Hap01	51.582N, 13.970E
Germany: Schwarze Elster	Elbe	North Sea	>ID118			Aas01_COI	KF888296			Aas01_16S	KF888279	Hap01	51.582N, 13.970E
Germany: Schwarze Elster	Elbe	North Sea	>ID119			Aas01_COI	KF888296			Aas01_16S	KF888279	Hap01	51.582N, 13.970E
Germany: Schwarze Elster	Elbe	North Sea	>ID120			Aas01_COI	KF888296			Aas01_16S	KF888279	Hap01	51.582N, 13.970E
Germany: Schwarze Elster	Elbe	North Sea	>ID121			Aas01_COI	KF888296			Aas01_16S	KF888279	Hap01	51.582N, 13.970E
Germany: Schwarze Elster	Elbe	North Sea	>ID122			Aas01_COI	KF888296			Aas01_16S	KF888279	Hap01	51.582N, 13.970E
Germany: Spielberg	Rhine	North Sea	>ID316			Aas01_COI	KF888296			Aas01_16S	KF888279	Hap01	50.304N, 9.298E
Germany: Spielberg	Rhine	North Sea	>ID317			Aas01_COI	KF888296			Aas01_16S	KF888279	Hap01	50.304N, 9.298E
Germany: Spielberg	Rhine	North Sea	>ID318			Aas20_COI	KF888315			Aas03_16S	KF888281	Hap32	50.304N, 9.298E
Germany: Spielberg	Rhine	North Sea	>ID319			Aas20_COI	KF888315			Aas03_16S	KF888281	Hap32	50.304N, 9.298E
Germany: Spielberg	Rhine	North Sea	>ID320			Aas20_COI	KF888315			Aas03_16S	KF888281	Hap32	50.304N, 9.298E
Germany: Steinbruch Rot	Rhine	North Sea	>ID321			Aas01_COI	KF888296			Aas01_16S	KF888279	Hap01	50.654N, 9.219E
Germany: Steinbruch Rot	Rhine	North Sea	>ID322			Aas01_COI	KF888296			Aas01_16S	KF888279	Hap01	50.654N, 9.219E
Germany: Steinbruch Rot	Rhine	North Sea	>ID323			Aas01_COI	KF888296			Aas01_16S	KF888279	Hap01	50.654N, 9.219E
Germany: Steinbruch Rot	Rhine	North Sea	>ID324			Aas01_COI	KF888296			Aas01_16S	KF888279	Hap01	50.654N, 9.219E
Germany: Steinbruch Rot	Rhine	North Sea	>ID325			Aas01_COI	KF888296			Aas01_16S	KF888279	Hap01	50.654N, 9.219E
Germany: Stepenitz	Elbe	North Sea	>ID112			Aas01_COI	KF888296			Aas01_16S	KF888279	Hap01	53.037N, 12.042E
Germany: Stepenitz	Elbe	North Sea	>ID113			Aas01_COI	KF888296			Aas01_16S	KF888279	Hap01	53.037N, 12.042E
Germany: Stepenitz	Elbe	North Sea	>ID114			Aas01_COI	KF888296			Aas01_16S	KF888279	Hap01	53.037N, 12.042E
Germany: Stepenitz	Elbe	North Sea	>ID115			Aas01_COI	KF888296			Aas01_16S	KF888279	Hap01	53.037N, 12.042E
Germany: Stepenitz	Elbe	North Sea	>ID116			Aas01_COI	KF888296			Aas01_16S	KF888279	Hap01	53.037N, 12.042E
Germany: Stippbach	Rhine	North Sea	>ID326			Aas01_COI	KF888296			Aas01_16S	KF888279	Hap01	50.704N, 9.359E
Germany: Stippbach	Rhine	North Sea	>ID327			Aas01_COI	KF888296			Aas01_16S	KF888279	Hap01	50.704N, 9.359E
Germany: Stippbach	Rhine	North Sea	>ID328			Aas01_COI	KF888296			Aas01_16S	KF888279	Hap01	50.704N, 9.359E
Germany: Stippbach	Rhine	North Sea	>ID329			Aas01_COI	KF888296			Aas01_16S	KF888279	Hap01	50.704N, 9.359E
Germany: Stippbach	Rhine	North Sea	>ID330			Aas01_COI	KF888296			Aas01_16S	KF888279	Hap01	50.704N, 9.359E
Germany: Tonkuhle	German Baltic Sea estuary	Baltic Sea	>ID40			Aas01_COI	KF888296			Aas01_16S	KF888279	Hap01	54.333N, 12.833E
Germany: Tonkuhle	German Baltic Sea estuary	Baltic Sea	>ID41			Aas01_COI	KF888296			Aas01_16S	KF888279	Hap01	54.333N, 12.833E
Germany: Tonkuhle	German Baltic Sea estuary	Baltic Sea	>ID42			Aas01_COI	KF888296			Aas01_16S	KF888279	Hap01	54.333N, 12.833E
Germany: Urff	Weser	North Sea	>ID343			Aas01_COI	KF888296			Aas01_16S	KF888279	Hap01	51.041N, 9.991E
Germany: Urff	Weser	North Sea	>ID344			Aas01_COI	KF888296			Aas01_16S	KF888279	Hap01	51.041N, 9.991E
Germany: Urff	Weser	North Sea	>ID345			Aas01_COI	KF888296			Aas01_16S	KF888279	Hap01	51.041N, 9.991E
Germany: Urff	Weser	North Sea	>ID346			Aas01_COI	KF888296			Aas01_16S	KF888279	Hap01	51.041N, 9.991E
Germany: Waldteich bei Wallenfels	Rhine	North Sea	>ID331			Aas01_COI	KF888296			Aas01_16S	KF888279	Hap01	50.774N, 8.438E
Germany: Waldteich bei Wallenfels	Rhine	North Sea	>ID332			Aas01_COI	KF888296			Aas01_16S	KF888279	Hap01	50.774N, 8.438E
Germany: Waldteich bei Wallenfels	Rhine	North Sea	>ID333			Aas01_COI	KF888296			Aas01_16S	KF888279	Hap01	50.774N, 8.438E
Germany: Waldteich bei Wallenfels	Rhine	North Sea	>ID334			Aas01_COI	KF888296			Aas01_16S	KF888279	Hap01	50.774N, 8.438E
Germany: Waldteich bei Wallenfels	Rhine	North Sea	>ID335			Aas01_COI	KF888296			Aas02_16S	KF888280	Hap02	50.774N, 8.438E
Germany: Waldteich, Irrschelde	Rhine	North Sea	>ID226			Aas01_COI	KF888296			Aas01_16S	KF888279	Hap01	50.763N, 8.399E
Germany: Waldteich, Irrschelde	Rhine	North Sea	>ID227			Aas01_COI	KF888296			Aas01_16S	KF888279	Hap01	50.763N, 8.399E
Germany: Waldteich, Irrschelde	Rhine	North Sea	>ID228			Aas01_COI	KF888296			Aas01_16S	KF888279	Hap01	50.763N, 8.399E
Germany: Waldteich, Irrschelde	Rhine	North Sea	>ID229			Aas01_COI	KF888296			Aas01_16S	KF888279	Hap01	50.763N, 8.399E
Germany: Waldteich, Irrschelde	Rhine	North Sea	>ID230			Aas01_COI	KF888296			Aas01_16S	KF888279	Hap01	50.763N, 8.399E
Germany: Wielenbach	Danube	Black Sea	>ID368			Aas01_COI	KF888296			Aas01_16S	KF888279	Hap01	47.841N, 10.952E
Germany: Wielenbach	Danube	Black Sea	>ID369			Aas01_COI	KF888296			Aas01_16S	KF888279	Hap01	47.841N, 10.952E
Germany: Wolfsägertal	Rhine	North Sea	>ID286			Aas01_COI	KF888296			Aas01_16S	KF888279	Hap01	49.106N, 7.701E
Germany: Wolfsägertal	Rhine	North Sea	>ID287			Aas01_COI	KF888296			Aas01_16S	KF888279	Hap01	49.106N, 7.701E
Germany: Wolfsägertal	Rhine	North Sea	>ID288			Aas04_COI	KF888299			Aas01_16S	KF888279	Hap05	49.106N, 7.701E
Germany: Wolfsägertal	Rhine	North Sea	>ID289			Aas21_COI	KF888316			Aas01_16S	KF888279	Hap31	49.106N, 7.701E
Germany: Wolfsägertal	Rhine	North Sea	>ID290			Aas21_COI	KF888316			Aas01_16S	KF888279	Hap31	49.106N, 7.701E
Germany: Wolfsägertal	Rhine	North Sea	>ID291			Aas20_COI	KF888315			Aas03_16S	KF888281	Hap32	49.106N, 7.701E
Germany: Wolfsägertal	Rhine	North Sea	>ID292			Aas20_COI	KF888315			Aas03_16S	KF888281	Hap32	49.106N, 7.701E
Germany: Zoo Zajak, Petstore	Hatchery/Rhine	North Sea	>ID544			Aas01_COI	KF888296			Aas01_16S	KF888279	Hap01	51.488N, 6.810E
Germany: Zoo Zajak, Petstore	Hatchery/Rhine	North Sea	>ID545			Aas01_COI	KF888296			Aas01_16S	KF888279	Hap01	51.488N, 6.810E
Germany: Zoo Zajak, Petstore	Hatchery/Rhine	North Sea	>ID546			Aas01_COI	KF888296			Aas01_16S	KF888279	Hap01	51.488N, 6.810E
Germany: Zoo Zajak, Petstore	Hatchery/Rhine	North Sea	>ID547			Aas01_COI	KF888296			Aas01_16S	KF888279	Hap01	51.488N, 6.810E
Germany: Zoo Zajak, Petstore	Hatchery/Rhine	North Sea	>ID548			Aas01_COI	KF888296			Aas01_16S	KF888279	Hap01	51.488N, 6.810E
Greece: Aoo1	Aoos		>ID598			C5	KY067209			A2	KY048194	A2C5	N39°49′ E21°07′
Greece: Aoo1	Aoos		>ID599			C8	KY067210			A2	KY048194	A2C8	N39°49′ E21°07′
Greece: Aoo2	Aoos		>ID600			C21	KY067215			A2	KY048194	A2C21	N39°48′ E21°06′
Greece: Aoo2	Aoos		>ID601			C50	KY067226			A2	KY048194	A2C50	N39°48′ E21°06′
Greece: Arahthos	Arahthos		>ID580			C21	KY067215			A2	KY048199	A2C21	N39°15′ E21°00′
Greece: Begoritida/Agra	Aliakmon		>ID571			C15	KY067213			A2	KY048194	A2C15	N40°46′ E21°46′
Greece: Chani Kaber Aga	Arahthos		>ID574			C21	KY067215			A2	KY048197	A2C21	N39°43′ E20°57′
Greece: Chani Kaber Aga	Arahthos		>ID575			C21	KY067215			A2	KY048194	A2C21	N39°43′ E20°57′
Greece: Doxa	Streams of North Peloponnese Beach		>ID588			C2	KY067208			A2	KY048195	A2C2	N37°55′ E22°17′
Greece: Doxa	Streams of North Peloponnese Beach		>ID589			C2	KY067208			A2	KY048194	A2C2	N37°55′ E22°17′
Greece: Fragkades	Aoos		>ID586			C14	KY067212			A2	KY048194	A2C14	N39°50′ E20°48′
Greece: Fragkades	Aoos		>ID587			C14	KY067212			A2	KY048194	A2C14	N39°50′ E20°48′
Greece: Kalamas	Kalamas		>ID572			C29	KY067218			A2	KY048194	A2C29	N39°39′ E20°31′
Greece: Kalamas	Kalamas		>ID573			C33	KY067222			A2	KY048194	A2C33	N39°39′ E20°31′
Greece: Kalivia	Acheloos		>ID578			C30	KY067219			A1	KY048198	A1C30	N39°18′ E21°42′
Greece: Kalivia	Acheloos		>ID579			C35	KY067224			A2	KY048194	A2C35	N39°18′ E21°42′
Greece: Karya	Ziliana		>ID596			C1	KY067207			A2	KY048202	A2C1	N39°58′ E22°25′
Greece: Karya	Ziliana		>ID597			C40	KY067225			A2	KY048194	A2C40	N39°58′ E22°25′
Greece: Kefalovriso	Pinios		>ID583			C32	KY067221			A3	KY048201	A3C32	N39°53′ E22°04′
Greece: Koniskos	Pinios		>ID592			C31	KY067220			A2	KY048194	A2C31	N39°48′ E21°48′
Greece: Koniskos	Pinios		>ID593			C31	KY067220			A2	KY048194	A2C31	N39°48′ E21°48′
Greece: Krania	Aliakmon		>ID594			C31	KY067220			A6	KY048194	A6C31	N39°51′ E21°18′
Greece: Krania	Aliakmon		>ID595			C31	KY067220			A2	KY048200	A2C31	N39°51′ E21°18′
Greece: Loggas	Pinios		>ID604			C31	KY067220			A2	KY048194	A2C31	N39°49′ E21°55′
Greece: Loggas	Pinios		>ID605			C31	KY067220			A2	KY048195	A2C31	N39°49′ E21°55′
Greece: Neochori	Acheloos		>ID590			C27	KY067216			A2	KY048194	A2C27	N39°17′ E21°43′
Greece: Neochori	Acheloos		>ID591			C27	KY067216			A2	KY048194	A2C27	N39°17′ E21°43′
Greece: Palaifyto	Axios		>ID576			C28	KY067217			A2	KY048197	A2C28	N40°47′ E22°17′
Greece: Palaifyto	Axios		>ID577			C34	KY067223			A2	KY048194	A2C34	N40°47′ E22°17′
Greece: Perivoli	Pinios		>ID582			C10	KY067211			A16	KY048193	A16C10	N39°03′ E22°11′
Greece: Pertouli	Acheloos		>ID581			C1	KY067207			A2	KY048200	0A2C21	N39°32′ E21°28′
Greece: Skotina	Ziliana		>ID584			C1	KY067207			A2	KY048194	A2C1	N39°59′ E22°27′
Greece: Skotina	Ziliana		>ID585			C1	KY067207			A2	KY048194	A2C1	N39°59′ E22°27′
Greece: Tsivlo	Streams of North Peloponnese Beach		>ID606			C1	KY067207			A4	KY048196	A4C1	N38°04′ E22°13′
Greece: Tsivlo	Streams of North Peloponnese Beach		>ID607			C51	KY067227			A4	KY048196	A4C51	N38°04′ E22°13′
Greece: Tzaravina	Kalamas		>ID602			C52	KY067228			A2	KY048194	A2C52	N39°54′ E20°30′
Greece: Tzaravina	Kalamas		>ID603			C18	KY067214			A2	KY048194	A2C18	N39°54′ E20°30′
Hungary: Kádárta	Danube	Black Sea	>ID370			Aas01_COI	KF888296			Aas01_16S	KF888279	Hap01	47.120N, 17.962E
Hungary: Kádárta	Danube	Black Sea	>ID371			Aas01_COI	KF888296			Aas01_16S	KF888279	Hap01	47.120N, 17.962E
Hungary: Kádárta	Danube	Black Sea	>ID372			Aas01_COI	KF888296			Aas01_16S	KF888279	Hap01	47.120N, 17.962E
Hungary: Pét	Danube	Black Sea	>ID373			Aas07_COI	KF888302			Aas01_16S	KF888279	Hap09	47.184N, 18.096E
Kosovo: Unnamed stream Ferizaj (Uroševac)	Lepenac River	Aegean Sea	>Aa59_Farizej	Ssh3				MW726629	MW726330			Hap26	42.370N, 21.148E
Kosovo: Unnamed stream Ferizaj (Uroševac)	Lepenac River	Aegean Sea	>ID543			Aas16_COI	KF888311			Aas09_16S	KF888287	Hap26	42.370N, 21.148E
Montenegro: Lake Liverovići, Gračenica River	Morača River	Adriatic Sea	>AaCG3_Liverov	Ssh6				MW726626	MW726327				42.740N, 19.072E
Montenegro: Lake Liverovići, Gračenica River	Morača River	Adriatic Sea	>AACG01_LIVEROV	Ssh6				MW726473	MW726241			Hap54	42.740N, 19.072E
Montenegro: Lake Liverovići, Gračenica River	Morača River	Adriatic Sea	>ID539			Aas26_COI	KF888321			Aas15_16S	KF888293	Hap42	42.740N, 19.072E
Montenegro: Zeta River	Morača River	Adriatic Sea	>ID533 (=AaCG21_Zeta)	Ssh12		Aas20_COI	KF888325	MW726628	MW726329	Aas10_16S	KF888288	Hap28	42.514N, 19.173E
Montenegro: Zeta River	Morača River	Adriatic Sea	>ID534 (=AaCG31_Zeta)			Aas21_COI	KF888316	MW726627	MW726328	Aas10_16S	KF888288	Hap29	42.514N, 19.173E
Montenegro: Zeta River	Morača River	Adriatic Sea	>ID535 (=AACG14_ZETA)	Ssh7		Aas26_COI	KF888321	MW726475	MW726243	Aas15_16S	KF888293	Hap42	42.514N, 19.173E
Montenegro: Zeta River	Morača River	Adriatic Sea	>ID536 (=AACG19_ZETA)	Ssh7		Aas26_COI	KF888321	MW726474	MW726242	Aas15_16S	KF888293	Hap42	42.514N, 19.173E
Montenegro: Zeta River	Morača River	Adriatic Sea	>ID537 (=AACG26_ZETA)	Ssh7		Aas26_COI	KF888321	MW726472	MW726240	Aas15_16S	KF888293	Hap42	42.514N, 19.173E
Montenegro: Zeta River	Morača River	Adriatic Sea	>ID538 (=AACG27_ZETA)	Ssh7		Aas26_COI	KF888321	MW726471	MW726239	Aas15_16S	KF888293	Hap42	42.514N, 19.173E
Poland: Bez Nazwu	Wieprza	Baltic Sea	>ID53			Aas01_COI	KF888296			Aas01_16S	KF888279	Hap01	54.067N, 17.083E
Poland: Bez Nazwu	Wieprza	Baltic Sea	>ID54			Aas01_COI	KF888296			Aas01_16S	KF888279	Hap01	54.067N, 17.083E
Poland: Bez Nazwu	Wieprza	Baltic Sea	>ID55			Aas01_COI	KF888296			Aas01_16S	KF888279	Hap01	54.067N, 17.083E
Poland: Bez Nazwu	Wieprza	Baltic Sea	>ID56			Aas01_COI	KF888296			Aas01_16S	KF888279	Hap01	54.067N, 17.083E
Poland: Bez Nazwu	Wieprza	Baltic Sea	>ID57			Aas01_COI	KF888296			Aas01_16S	KF888279	Hap01	54.067N, 17.083E
Poland: Czarne	Wisla	Baltic Sea	>ID58			Aas01_COI	KF888296			Aas01_16S	KF888279	Hap01	50.038N, 21.993E
Poland: Czarne	Wisla	Baltic Sea	>ID59			Aas01_COI	KF888296			Aas01_16S	KF888279	Hap01	50.038N, 21.993E
Poland: Czarne	Wisla	Baltic Sea	>ID60			Aas01_COI	KF888296			Aas01_16S	KF888279	Hap01	50.038N, 21.993E
Poland: Czarne	Wisla	Baltic Sea	>ID61			Aas01_COI	KF888296			Aas01_16S	KF888279	Hap01	50.038N, 21.993E
Poland: Czarne	Wisla	Baltic Sea	>ID62			Aas01_COI	KF888296			Aas01_16S	KF888279	Hap01	50.038N, 21.993E
Poland: Lake 1 close to Miastko	Polish Baltic Sea estuary	Baltic Sea	>ID73			Aas01_COI	KF888296			Aas01_16S	KF888279	Hap01	54.017N, 16.983E
Poland: Lake 1 close to Miastko	Polish Baltic Sea estuary	Baltic Sea	>ID74			Aas01_COI	KF888296			Aas01_16S	KF888279	Hap01	54.017N, 16.983E
Poland: Lake 1 close to Miastko	Polish Baltic Sea estuary	Baltic Sea	>ID75			Aas01_COI	KF888296			Aas01_16S	KF888279	Hap01	54.017N, 16.983E
Poland: Lake 1 close to Miastko	Polish Baltic Sea estuary	Baltic Sea	>ID76			Aas01_COI	KF888296			Aas01_16S	KF888279	Hap01	54.017N, 16.983E
Poland: Lake 1 close to Miastko	Polish Baltic Sea estuary	Baltic Sea	>ID77			Aas01_COI	KF888296			Aas01_16S	KF888279	Hap01	54.017N, 16.983E
Poland: Lake 2 close to Miastko	Polish Baltic Sea estuary	Baltic Sea	>ID78			Aas01_COI	KF888296			Aas01_16S	KF888279	Hap01	54.017N, 16.983E
Poland: Lake 2 close to Miastko	Polish Baltic Sea estuary	Baltic Sea	>ID79			Aas01_COI	KF888296			Aas01_16S	KF888279	Hap01	54.017N, 16.983E
Poland: Lake 2 close to Miastko	Polish Baltic Sea estuary	Baltic Sea	>ID80			Aas01_COI	KF888296			Aas01_16S	KF888279	Hap01	54.017N, 16.983E
Poland: Lake 2 close to Miastko	Polish Baltic Sea estuary	Baltic Sea	>ID81			Aas01_COI	KF888296			Aas01_16S	KF888279	Hap01	54.017N, 16.983E
Poland: Lake 2 close to Miastko	Polish Baltic Sea estuary	Baltic Sea	>ID82			Aas01_COI	KF888296			Aas01_16S	KF888279	Hap01	54.017N, 16.983E
Poland: Lake 3 close to Miastko	Polish Baltic Sea estuary	Baltic Sea	>ID83			Aas01_COI	KF888296			Aas01_16S	KF888279	Hap01	54.017N, 16.983E
Poland: Lake 3 close to Miastko	Polish Baltic Sea estuary	Baltic Sea	>ID84			Aas01_COI	KF888296			Aas01_16S	KF888279	Hap01	54.017N, 16.983E
Poland: Lake 3 close to Miastko	Polish Baltic Sea estuary	Baltic Sea	>ID85			Aas01_COI	KF888296			Aas01_16S	KF888279	Hap01	54.017N, 16.983E
Poland: Lake 3 close to Miastko	Polish Baltic Sea estuary	Baltic Sea	>ID86			Aas01_COI	KF888296			Aas01_16S	KF888279	Hap01	54.017N, 16.983E
Poland: Lake 3 close to Miastko	Polish Baltic Sea estuary	Baltic Sea	>ID87			Aas01_COI	KF888296			Aas01_16S	KF888279	Hap01	54.017N, 16.983E
Poland: Rakowe Duze	Odra	Baltic Sea	>ID43			Aas01_COI	KF888296			Aas01_16S	KF888279	Hap01	53.915N, 16.796E
Poland: Rakowe Duze	Odra	Baltic Sea	>ID44			Aas01_COI	KF888296			Aas01_16S	KF888279	Hap01	53.915N, 16.796E
Poland: Rakowe Duze	Odra	Baltic Sea	>ID45			Aas01_COI	KF888296			Aas01_16S	KF888279	Hap01	53.915N, 16.796E
Poland: Rakowe Duze	Odra	Baltic Sea	>ID46			Aas01_COI	KF888296			Aas01_16S	KF888279	Hap01	53.915N, 16.796E
Poland: Rakowe Duze	Odra	Baltic Sea	>ID47			Aas01_COI	KF888296			Aas01_16S	KF888279	Hap01	53.915N, 16.796E
Poland: Rosko	Wisla	Baltic Sea	>ID63			Aas01_COI	KF888296			Aas01_16S	KF888279	Hap01	53.903N, 17.143E
Poland: Rosko	Wisla	Baltic Sea	>ID64			Aas01_COI	KF888296			Aas01_16S	KF888279	Hap01	53.903N, 17.143E
Poland: Rosko	Wisla	Baltic Sea	>ID65			Aas01_COI	KF888296			Aas05_16S	KF888283	Hap15	53.903N, 17.143E
Poland: Rosko	Wisla	Baltic Sea	>ID66			Aas01_COI	KF888296			Aas05_16S	KF888283	Hap15	53.903N, 17.143E
Poland: Rosko	Wisla	Baltic Sea	>ID67			Aas14_COI	KF888309			Aas01_16S	KF888279	Hap18	53.903N, 17.143E
Poland: Seki	Wieprza	Baltic Sea	>ID48			Aas01_COI	KF888296			Aas01_16S	KF888279	Hap01	54.065N, 17.095E
Poland: Seki	Wieprza	Baltic Sea	>ID49			Aas01_COI	KF888296			Aas01_16S	KF888279	Hap01	54.065N, 17.095E
Poland: Seki	Wieprza	Baltic Sea	>ID50			Aas01_COI	KF888296			Aas01_16S	KF888279	Hap01	54.065N, 17.095E
Poland: Seki	Wieprza	Baltic Sea	>ID51			Aas01_COI	KF888296			Aas01_16S	KF888279	Hap01	54.065N, 17.095E
Poland: Seki	Wieprza	Baltic Sea	>ID52			Aas01_COI	KF888296			Aas01_16S	KF888279	Hap01	54.065N, 17.095E
Poland: Tomczyna	Wisla	Baltic Sea	>ID68			Aas01_COI	KF888296			Aas01_16S	KF888279	Hap01	50.036N, 22.004E
Poland: Tomczyna	Wisla	Baltic Sea	>ID69			Aas01_COI	KF888296			Aas01_16S	KF888279	Hap01	50.036N, 22.004E
Poland: Tomczyna	Wisla	Baltic Sea	>ID70			Aas01_COI	KF888296			Aas01_16S	KF888279	Hap01	50.036N, 22.004E
Poland: Tomczyna	Wisla	Baltic Sea	>ID71			Aas01_COI	KF888296			Aas01_16S	KF888279	Hap01	50.036N, 22.004E
Poland: Tomczyna	Wisla	Baltic Sea	>ID72			Aas01_COI	KF888296			Aas01_16S	KF888279	Hap01	50.036N, 22.004E
Romania: Agrij	Somes/Danube	Black Sea	>ID494			Aas01_COI	KF888296			Aas01_16S	KF888279	Hap01	47.019N, 22.981E
Romania: Almasu Mic de Munte	Danube	Black Sea	>ID25			Aas01_COI	JN254659						46.052N, 23.072E
Romania: Almasu Mic de Munte	Danube	Black Sea	>ID26			Aas01_COI	JN254659						46.052N, 23.072E
Romania: Almasu Mic de Munte	Danube	Black Sea	>ID27			AAS31_COI	JN254677						46.052N, 23.072E
Romania: Anina	Danube	Black Sea	>ID9			Aas01_COI	JN254659						45.059N, 21.887E
Romania: Anina	Danube	Black Sea	>ID10			Aas01_COI	JN254659						45.059N, 21.887E
Romania: Araneag	Danube	Black Sea	>ID28			Aas01_COI	JN254659						46.210N, 21.357E
Romania: Araneag	Danube	Black Sea	>ID29			Aas20_COI	JN254678						46.210N, 21.357E
Romania: Araneag	Danube	Black Sea	>ID30			Aas16_COI	JN254669						46.210N, 21.357E
Romania: Bacaia	Caras/Danube	Black Sea	>ID434			Aas01_COI	KF888296			Aas01_16S	KF888279	Hap01	46.010N, 23.171E
Romania: Bacaia	Caras/Danube	Black Sea	>ID435			Aas01_COI	KF888296			Aas01_16S	KF888279	Hap01	46.010N, 23.171E
Romania: Baita	Danube	Black Sea	>ID23			Aas01_COI	JN254659						46.033N, 22.884E
Romania: Baita	Danube	Black Sea	>ID24			Aas01_COI	JN254659						46.033N, 22.884E
Romania: Balsa	Caras/Danube	Black Sea	>ID436			Aas20_COI	KF888315			Aas13_16S	KF888291	Hap40	46.019N, 23.120E
Romania: Balsa	Caras/Danube	Black Sea	>ID437			Aas20_COI	KF888315			Aas13_16S	KF888291	Hap40	46.019N, 23.120E
Romania: Balsa	Mures/Danube	Black Sea	>ID448			Aas01_COI	KF888296			Aas01_16S	KF888279	Hap01	46.040N, 23.070E
Romania: Balsa	Mures/Danube	Black Sea	>ID449			Aas01_COI	KF888296			Aas01_16S	KF888279	Hap01	46.040N, 23.070E
Romania: Balsa	Mures/Danube	Black Sea	>ID450			Aas01_COI	KF888296			Aas01_16S	KF888279	Hap01	46.040N, 23.070E
Romania: Balsa2	Mures/Danube	Black Sea	>ID451			Aas20_COI	KF888315			Aas13_16S	KF888291	Hap40	46.040N, 23.070E
Romania: Barcau	Cris/Danube	Black Sea	>ID379			Aas01_COI	KF888296			Aas01_16S	KF888279	Hap01	47.236N, 21.946E
Romania: Barcau	Cris/Danube	Black Sea	>ID380			Aas20_COI	KF888315			Aas13_16S	KF888291	Hap40	47.236N, 21.946E
Romania: Bezid	tisa/Danube	Black Sea	>BZD01	Ssh2	Lshm2			MW726612					46.413N, 24.878E
Romania: Bezid	tisa/Danube	Black Sea	>BZD02	Ssh2	Lshm2			MW726611					46.413N, 24.878E
Romania: Bezid	tisa/Danube	Black Sea	>BZD03	Ssh2	Lshm2			MW726610					46.413N, 24.878E
Romania: Bezid	tisa/Danube	Black Sea	>BZD04	Ssh2	Lshm2			MW726609					46.413N, 24.878E
Romania: Bezid	tisa/Danube	Black Sea	>BZD05	Ssh2	Lshm2			MW726608					46.413N, 24.878E
Romania: Bezid	tisa/Danube	Black Sea	>BZD07	Ssh2	Lshm2			MW726607					46.413N, 24.878E
Romania: Bezid	tisa/Danube	Black Sea	>BZD08	Ssh2	Lshm2			MW726606					46.413N, 24.878E
Romania: Bezid	tisa/Danube	Black Sea	>BZD09	Ssh2	Lshm2			MW726605					46.413N, 24.878E
Romania: Bichigiu	Somes/Danube	Black Sea	>ID493			Aas01_COI	KF888296			Aas01_16S	KF888279	Hap01	47.399N, 24.378E
Romania: Bogata	Olt/Danube	Black Sea	>ID486			Aas17_COI	KF888312			Aas06_16S	KF888284	Hap24	45.948N, 25.373E
Romania: Bradisoru de Jos	Danube	Black Sea	>ID1			Aas16_COI	JN254669						45.104N, 21.768E
Romania: Buhui	Caras/Danube	Black Sea	>ID416			Aas01_COI	KF888296			Aas01_16S	KF888279	Hap01	45.064N, 21.889E
Romania: Buhui	Caras/Danube	Black Sea	>ID417			Aas01_COI	KF888296			Aas01_16S	KF888279	Hap01	45.064N, 21.889E
Romania: Caianu	Caras/Danube	Black Sea	>ID433			Aas01_COI	KF888296			Aas01_16S	KF888279	Hap01	46.033N, 22.885E
Romania: Caras	Caras/Danube	Black Sea	>ID432			Aas16_COI	KF888311			Aas06_16S	KF888284	Hap23	45.058N, 21.524E
Romania: Carasova	Danube	Black Sea	>ID2			Aas16_COI	JN254669						45.174N, 21.952E
Romania: Carasova	Danube	Black Sea	>ID3			Aas16_COI	JN254669						45.174N, 21.952E
Romania: Carnecea	Danube	Black Sea	>ID21			Aas16_COI	JN254669						45.206N, 21.636E
Romania: Carpan	Mures/Danube	Black Sea	>ID456			Aas23_COI	KF888318			Aas01_16S	KF888279	Hap34	46.066N, 22.931E
Romania: Ciornovãt	Caras/Danube	Black Sea	>ID425			Aas16_COI	KF888311			Aas06_16S	KF888284	Hap23	45.179N, 21.553E
Romania: Ciornovãt	Caras/Danube	Black Sea	>ID426			Aas16_COI	KF888311			Aas07_16S	KF888285	Hap22	45.179N, 21.553E
Romania: Ciornovãt	Caras/Danube	Black Sea	>ID427			Aas16_COI	KF888311			Aas07_16S	KF888285	Hap22	45.179N, 21.553E
Romania: Ciornovãt	Caras/Danube	Black Sea	>ID428			Aas16_COI	KF888311			Aas07_16S	KF888285	Hap22	45.179N, 21.553E
Romania: Ciornovãt	Caras/Danube	Black Sea	>ID429			Aas16_COI	KF888311			Aas07_16S	KF888285	Hap22	45.179N, 21.553E
Romania: Ciornovãt	Caras/Danube	Black Sea	>ID430			Aas16_COI	KF888311			Aas07_16S	KF888285	Hap22	45.179N, 21.553E
Romania: Ciornovãt	Caras/Danube	Black Sea	>ID431			Aas16_COI	KF888311			Aas07_16S	KF888285	Hap22	45.179N, 21.553E
Romania: Cladovita	Mures/Danube	Black Sea	>ID452			Aas01_COI	KF888296			Aas01_16S	KF888279	Hap01	46.151N, 21.357E
Romania: Cladovita	Mures/Danube	Black Sea	>ID453			Aas01_COI	KF888296			Aas01_16S	KF888279	Hap01	46.151N, 21.357E
Romania: Cladovita	Mures/Danube	Black Sea	>ID454			Aas08_COI	KF888303			Aas01_16S	KF888279	Hap10	46.151N, 21.357E
Romania: Cladovita	Mures/Danube	Black Sea	>ID455			Aas08_COI	KF888303			Aas01_16S	KF888279	Hap10	46.151N, 21.357E
Romania: Clocotici	Caras/Danube	Black Sea	>ID397			Aas24_COI	KF888319			Aas06_16S	KF888284	Hap36	45.241N, 21.838E
Romania: Clocotici	Caras/Danube	Black Sea	>ID398			Aas20_COI	KF888315			Aas06_16S	KF888284	Hap37	45.241N, 21.838E
Romania: Clocotici	Caras/Danube	Black Sea	>ID399			Aas20_COI	KF888315			Aas06_16S	KF888284	Hap37	45.241N, 21.838E
Romania: Clocotici	Caras/Danube	Black Sea	>ID400			Aas20_COI	KF888315			Aas06_16S	KF888284	Hap37	45.241N, 21.838E
Romania: Clocotici	Caras/Danube	Black Sea	>ID401			Aas20_COI	KF888315			Aas06_16S	KF888284	Hap37	45.241N, 21.838E
Romania: Clocotici	Caras/Danube	Black Sea	>ID402			Aas20_COI	KF888315			Aas06_16S	KF888284	Hap37	45.241N, 21.838E
Romania: Clocotici	Caras/Danube	Black Sea	>ID403			Aas20_COI	KF888315			Aas06_16S	KF888284	Hap37	45.241N, 21.838E
Romania: Clocotici	Caras/Danube	Black Sea	>ID404			Aas20_COI	KF888315			Aas06_16S	KF888284	Hap37	45.241N, 21.838E
Romania: Comarnic	Caras/Danube	Black Sea	>ID406			Aas16_COI	KF888311			Aas06_16S	KF888284	Hap23	45.179N, 21.953E
Romania: Conop	Mures/Danube	Black Sea	>ID458			Aas01_COI	KF888296			Aas01_16S	KF888279	Hap01	46.122N, 21.359E
Romania: Conop	Mures/Danube	Black Sea	>ID459			Aas20_COI	KF888315			Aas13_16S	KF888291	Hap40	46.122N, 21.359E
Romania: Conop	Mures/Danube	Black Sea	>ID460			Aas20_COI	KF888315			Aas13_16S	KF888291	Hap40	46.122N, 21.359E
Romania: Crisul	Mures/Danube	Black Sea	>ID465			Aas01_COI	KF888296			Aas01_16S	KF888279	Hap01	46.166N, 24.702E
Romania: Crisul	Mures/Danube	Black Sea	>ID466			Aas01_COI	KF888296			Aas01_16S	KF888279	Hap01	46.166N, 24.702E
Romania: Crisul	Mures/Danube	Black Sea	>ID467			Aas01_COI	KF888296			Aas01_16S	KF888279	Hap01	46.166N, 24.702E
Romania: Derjana	Cris/Danube	Black Sea	>ID396			Aas20_COI	KF888315			Aas13_16S	KF888291	Hap40	46.230N, 22.709E
Romania: Dognecea	Caras/Danube	Black Sea	>ID423			Aas01_COI	KF888296			Aas01_16S	KF888279	Hap01	45.310N, 21.778E
Romania: Dognecea	Caras/Danube	Black Sea	>ID424			Aas16_COI	KF888311			Aas06_16S	KF888284	Hap23	45.310N, 21.778E
Romania: Dragoiestilor	Jiu/Danube	Black Sea	>ID439			Aas20_COI	KF888315			Aas13_16S	KF888291	Hap40	45.178N, 23.503E
Romania: Dragoiestilor	Jiu/Danube	Black Sea	>ID440			Aas20_COI	KF888315			Aas13_16S	KF888291	Hap40	45.178N, 23.503E
Romania: Dragoiestilor	Jiu/Danube	Black Sea	>ID441			Aas20_COI	KF888315			Aas13_16S	KF888291	Hap40	45.178N, 23.503E
Romania: Dragoiestilor	Jiu/Danube	Black Sea	>ID442			Aas20_COI	KF888315			Aas13_16S	KF888291	Hap40	45.178N, 23.503E
Romania: Dragoiestilor	Jiu/Danube	Black Sea	>ID443			Aas20_COI	KF888315			Aas13_16S	KF888291	Hap40	45.178N, 23.503E
Romania: Forotic	Danube	Black Sea	>ID15			Aas16_COI	JN254669						45.251N, 21.574E
Romania: Forotic	Danube	Black Sea	>ID16			Aas16_COI	JN254669						45.251N, 21.574E
Romania: Forotic	Danube	Black Sea	>ID17			Aas16_COI	JN254669						45.251N, 21.574E
Romania: Forotic	Danube	Black Sea	>ID18			Aas16_COI	JN254669						45.251N, 21.574E
Romania: Forotic	Danube	Black Sea	>ID19			Aas16_COI	JN254669						45.251N, 21.574E
Romania: Forotic	Danube	Black Sea	>ID20			Aas16_COI	JN254669						45.251N, 21.574E
Romania: Galben	Jiu/Danube	Black Sea	>ID438			Aas20_COI	KF888315			Aas11_16S	KF888289	Hap33	45.136N, 23.690E
Romania: Garliste	Danube	Black Sea	>ID4			Aas16_COI	JN254669						45.152N, 21.873E
Romania: Garliste	Danube	Black Sea	>ID5			Aas16_COI	JN254669						45.152N, 21.873E
Romania: Garliste	Danube	Black Sea	>ID6			Aas16_COI	JN254669						45.152N, 21.873E
Romania: Garliste	Danube	Black Sea	>ID7			Aas16_COI	JN254669						45.152N, 21.873E
Romania: Garliste	Danube	Black Sea	>ID8			Aas16_COI	JN254669						45.152N, 21.873E
Romania: Geoagiu	Mures/Danube	Black Sea	>ID457			Aas01_COI	KF888296			Aas01_16S	KF888279	Hap01	46.020N, 23.121E
Romania: Giacas	Mures/Danube	Black Sea	>ID468			Aas01_COI	KF888296			Aas01_16S	KF888279	Hap01	46.221N, 24.490E
Romania: Giacas	Mures/Danube	Black Sea	>ID469			Aas01_COI	KF888296			Aas01_16S	KF888279	Hap01	46.221N, 24.490E
Romania: Hartagani	Danube	Black Sea	>ID22			Aas23_COI	JN254679						46.060N, 22.925E
Romania: Hartibaciu	Olt/Danube	Black Sea	>ID479			Aas16_COI	KF888311			Aas06_16S	KF888284	Hap23	46.044N, 24.864E
Romania: Hartibaciu	Olt/Danube	Black Sea	>ID480			Aas16_COI	KF888311			Aas06_16S	KF888284	Hap23	46.044N, 24.864E
Romania: Hartibaciu	Olt/Danube	Black Sea	>ID481			Aas16_COI	KF888311			Aas06_16S	KF888284	Hap23	46.044N, 24.864E
Romania: Iazul	Olt/Danube	Black Sea	>ID475			Aas16_COI	KF888311			Aas06_16S	KF888284	Hap23	45.721N, 25.049E
Romania: Maierus	Olt/Danube	Black Sea	>ID485			Aas17_COI	KF888312			Aas06_16S	KF888284	Hap24	45.907N, 25.491E
Romania: Moravita	Caras/Danube	Black Sea	>ID418			Aas01_COI	KF888296			Aas01_16S	KF888279	Hap01	45.251N, 21.266E
Romania: Moravita	Caras/Danube	Black Sea	>ID419			Aas01_COI	KF888296			Aas06_16S	KF888284	Hap19	45.251N, 21.266E
Romania: Moravita	Caras/Danube	Black Sea	>ID420			Aas16_COI	KF888311			Aas06_16S	KF888284	Hap23	45.251N, 21.266E
Romania: Moravita	Caras/Danube	Black Sea	>ID421			Aas16_COI	KF888311			Aas06_16S	KF888284	Hap23	45.251N, 21.266E
Romania: Moravita	Caras/Danube	Black Sea	>ID422			Aas16_COI	KF888311			Aas06_16S	KF888284	Hap23	45.251N, 21.266E
Romania: Nadas	Cris/Danube	Black Sea	>ID384			Aas01_COI	KF888296			Aas01_16S	KF888279	Hap01	46.206N, 21.359E
Romania: Nadas	Cris/Danube	Black Sea	>ID385			Aas01_COI	KF888296			Aas01_16S	KF888279	Hap01	46.206N, 21.359E
Romania: Nadas	Cris/Danube	Black Sea	>ID386			Aas01_COI	KF888296			Aas01_16S	KF888279	Hap01	46.206N, 21.359E
Romania: Nadas	Cris/Danube	Black Sea	>ID387			Aas01_COI	KF888296			Aas01_16S	KF888279	Hap01	46.206N, 21.359E
Romania: Nadas	Cris/Danube	Black Sea	>ID388			Aas01_COI	KF888296			Aas01_16S	KF888279	Hap01	46.206N, 21.359E
Romania: Nadas	Cris/Danube	Black Sea	>ID389			Aas01_COI	KF888296			Aas01_16S	KF888279	Hap01	46.206N, 21.359E
Romania: Nadas	Cris/Danube	Black Sea	>ID390			Aas01_COI	KF888296			Aas01_16S	KF888279	Hap01	46.206N, 21.359E
Romania: Nadas	Cris/Danube	Black Sea	>ID391			Aas01_COI	KF888296			Aas01_16S	KF888279	Hap01	46.206N, 21.359E
Romania: Nadas	Cris/Danube	Black Sea	>ID392			Aas24_COI	KF888319			Aas01_16S	KF888279	Hap35	46.206N, 21.359E
Romania: Nadas	Cris/Danube	Black Sea	>ID393			Aas20_COI	KF888315			Aas12_16S	KF888290	Hap38	46.206N, 21.359E
Romania: Nadas	Cris/Danube	Black Sea	>ID394			Aas20_COI	KF888315			Aas12_16S	KF888290	Hap38	46.206N, 21.359E
Romania: Nadas	Cris/Danube	Black Sea	>ID395			Aas20_COI	KF888315			Aas12_16S	KF888290	Hap38	46.206N, 21.359E
Romania: Natra	Caras/Danube	Black Sea	>ID405			Aas16_COI	KF888311			Aas06_16S	KF888284	Hap23	45.105N, 21.769E
Romania: Niraj	Mures/Danube	Black Sea	>ID473			Aas01_COI	KF888296			Aas01_16S	KF888279	Hap01	46.589N, 24.814E
Romania: Ocna de Fier	Danube	Black Sea	>ID11			Aas01_COI	JN254659						45.354N, 21.759E
Romania: Ocna de Fier	Danube	Black Sea	>ID12			Aas16_COI	JN254669						45.354N, 21.759E
Romania: Ocna de Fier	Danube	Black Sea	>ID13			Aas16_COI	JN254669						45.354N, 21.759E
Romania: Ocna de Fier	Danube	Black Sea	>ID14			Aas16_COI	JN254669						45.354N, 21.759E
Romania: Oituz	Siret/Danube	Black Sea	>ID491			Aas16_COI	KF888311			Aas06_16S	KF888284	Hap23	46.288N, 26.590E
Romania: Petresti (Sebes)	Tisa/Danube	Black Sea	>PTR01	Ssh5	Lshm4			MW726532					45.909N, 23.559E
Romania: Petresti (Sebes)	Tisa/Danube	Black Sea	>PTR02	Ssh5	Lshm4			MW726531					45.909N, 23.559E
Romania: Petresti (Sebes)	Tisa/Danube	Black Sea	>PTR03	Ssh5	Lshm4			MW726530					45.909N, 23.559E
Romania: Petresti (Sebes)	Tisa/Danube	Black Sea	>PTR04	Ssh5	Lshm4			MW726529					45.909N, 23.559E
Romania: Petresti (Sebes)	Tisa/Danube	Black Sea	>PTR05	Ssh5	Lshm4			MW726528					45.909N, 23.559E
Romania: Petresti (Sebes)	Tisa/Danube	Black Sea	>PTR06	Ssh5	Lshm4			MW726527					45.909N, 23.559E
Romania: Petresti (Sebes)	Tisa/Danube	Black Sea	>PTR07	Ssh5	Lshm4			MW726526					45.909N, 23.559E
Romania: Poiana	Somes/Danube	Black Sea	>ID496			Aas01_COI	KF888296			Aas01_16S	KF888279	Hap01	47.353N, 23.788E
Romania: Racas	Cris/Danube	Black Sea	>ID377			Aas20_COI	KF888315			Aas13_16S	KF888291	Hap40	46.864N, 22.312E
Romania: Ravistea	Caras/Danube	Black Sea	>ID408			Aas16_COI	KF888311			Aas06_16S	KF888284	Hap23	45.153N, 21.876E
Romania: Ravistea	Caras/Danube	Black Sea	>ID409			Aas16_COI	KF888311			Aas06_16S	KF888284	Hap23	45.153N, 21.876E
Romania: Ravistea	Caras/Danube	Black Sea	>ID410			Aas16_COI	KF888311			Aas06_16S	KF888284	Hap23	45.153N, 21.876E
Romania: Ravistea	Caras/Danube	Black Sea	>ID411			Aas16_COI	KF888311			Aas06_16S	KF888284	Hap23	45.153N, 21.876E
Romania: Ravistea	Caras/Danube	Black Sea	>ID412			Aas16_COI	KF888311			Aas06_16S	KF888284	Hap23	45.153N, 21.876E
Romania: Ravistea	Caras/Danube	Black Sea	>ID413			Aas16_COI	KF888311			Aas06_16S	KF888284	Hap23	45.153N, 21.876E
Romania: Ravistea	Caras/Danube	Black Sea	>ID414			Aas16_COI	KF888311			Aas06_16S	KF888284	Hap23	45.153N, 21.876E
Romania: Ravistea	Caras/Danube	Black Sea	>ID415			Aas16_COI	KF888311			Aas06_16S	KF888284	Hap23	45.153N, 21.876E
Romania: Rupea	Olt/Danube	Black Sea	>ID487			Aas16_COI	KF888311			Aas06_16S	KF888284	Hap23	46.047N, 25.188E
Romania: Rupea	Olt/Danube	Black Sea	>ID488			Aas16_COI	KF888311			Aas06_16S	KF888284	Hap23	46.047N, 25.188E
Romania: Rupea	Olt/Danube	Black Sea	>ID489			Aas16_COI	KF888311			Aas06_16S	KF888284	Hap23	46.047N, 25.188E
Romania: Rupea	Olt/Danube	Black Sea	>ID490			Aas16_COI	KF888311			Aas06_16S	KF888284	Hap23	46.047N, 25.188E
Romania: Sarasau	Tisa/Danube	Black Sea	>ID497			Aas01_COI	KF888296			Aas01_16S	KF888279	Hap01	47.948N, 23.798E
Romania: Schiopu	Mures/Danube	Black Sea	>ID374			Aas01_COI	KF888296			Aas01_16S	KF888279	Hap01	n/a
Romania: Simbrezi	Olt/Danube	Black Sea	>ID483			Aas16_COI	KF888311			Aas06_16S	KF888284	Hap23	45.856N, 25.739E
Romania: Simbrezi	Olt/Danube	Black Sea	>ID484			Aas16_COI	KF888311			Aas06_16S	KF888284	Hap23	45.856N, 25.739E
Romania: Sinca	Olt/Danube	Black Sea	>ID476			Aas16_COI	KF888311			Aas06_16S	KF888284	Hap23	45.671N, 25.259E
Romania: Sohodol	Cris/Danube	Black Sea	>ID376			Aas20_COI	KF888315			Aas13_16S	KF888291	Hap40	46.335N, 23.005E
Romania: Solocma	Mures/Danube	Black Sea	>ID470			Aas01_COI	KF888296			Aas01_16S	KF888279	Hap01	46.488N, 24.958E
Romania: Solocma	Mures/Danube	Black Sea	>ID471			Aas01_COI	KF888296			Aas01_16S	KF888279	Hap01	46.488N, 24.958E
Romania: Solocma	Mures/Danube	Black Sea	>ID472			Aas01_COI	KF888296			Aas01_16S	KF888279	Hap01	46.488N, 24.958E
Romania: Somesul Rece	Tisa/Danube	Black Sea	>SMR01	Ssh2	Lshm5			MW726514					46.712N, 23.338E
Romania: Somesul Rece	Tisa/Danube	Black Sea	>SMR02	Ssh2	Lshm2			MW726513					46.712N, 23.338E
Romania: Somesul Rece	Tisa/Danube	Black Sea	>SMR03	Ssh2	Lshm2			MW726512					46.712N, 23.338E
Romania: Somesul Rece	Tisa/Danube	Black Sea	>SMR04	Ssh2	Lshm2			MW726511					46.712N, 23.338E
Romania: Somesul Rece	Tisa/Danube	Black Sea	>SMR05	Ssh2	Lshm2			MW726510					46.712N, 23.338E
Romania: Somesul Rece	Tisa/Danube	Black Sea	>SMR06	Ssh2	Lshm2			MW726509					46.712N, 23.338E
Romania: Somesul Rece	Tisa/Danube	Black Sea	>SMR07	Ssh2	Lshm2			MW726508					46.712N, 23.338E
Romania: Somesul Rece	Tisa/Danube	Black Sea	>SMR08	Ssh2	Lshm2			MW726507					46.712N, 23.338E
Romania: Somesul Rece	Tisa/Danube	Black Sea	>SMR10	Ssh2	Lshm2			MW726506					46.712N, 23.338E
Romania: Somesul Rece	Tisa/Danube	Black Sea	>SMR11	Ssh2	Lshm2			MW726505					46.712N, 23.338E
Romania: Somesul Rece	Tisa/Danube	Black Sea	>SMR12	Ssh2	Lshm2			MW726504					46.712N, 23.338E
Romania: Somesul Rece	Tisa/Danube	Black Sea	>SMR13	Ssh2	Lshm2			MW726503					46.712N, 23.338E
Romania: Somesul Rece	Tisa/Danube	Black Sea	>SMR16	Ssh2	Lshm2			MW726502					46.712N, 23.338E
Romania: Somesul Rece	Tisa/Danube	Black Sea	>SMR17	Ssh2	Lshm2			MW726501					46.712N, 23.338E
Romania: Somesul Rece	Tisa/Danube	Black Sea	>SMR19	Ssh2	Lshm2			MW726500					46.712N, 23.338E
Romania: Stramba	Siret/Danube	Black Sea	>ID492			Aas20_COI	KF888315			Aas13_16S	KF888291	Hap40	47.377N, 26.280E
Romania: Tamasesti	Mures/Danube	Black Sea	>ID444			Aas01_COI	KF888296			Aas01_16S	KF888279	Hap01	46.022N, 22.507E
Romania: Tamasesti	Mures/Danube	Black Sea	>ID445			Aas01_COI	KF888296			Aas01_16S	KF888279	Hap01	46.022N, 22.507E
Romania: Tamasesti	Mures/Danube	Black Sea	>ID446			Aas01_COI	KF888296			Aas01_16S	KF888279	Hap01	46.022N, 22.507E
Romania: Tamasesti	Mures/Danube	Black Sea	>ID447			Aas01_COI	KF888296			Aas01_16S	KF888279	Hap01	46.022N, 22.507E
Romania: Taraia	Olt/Danube	Black Sea	>ID474			Aas16_COI	KF888311			Aas06_16S	KF888284	Hap23	45.123N, 23.854E
Romania: Tebea	Cris/Danube	Black Sea	>ID375			Aas20_COI	KF888315			Aas13_16S	KF888291	Hap40	46.146N, 22.702E
Romania: Tetisu	Somes/Danube	Black Sea	>ID495			Aas01_COI	KF888296			Aas01_16S	KF888279	Hap01	46.913N, 23.056E
Romania: Toplita	Caras/Danube	Black Sea	>ID407			Aas16_COI	KF888311			Aas06_16S	KF888284	Hap23	45.182N, 21.949E
Romania: Valea Adanca	Olt/Danube	Black Sea	>ID477			Aas01_COI	KF888296			Aas01_16S	KF888279	Hap01	46.624N, 25.740E
Romania: Valea Adanca	Olt/Danube	Black Sea	>ID478			Aas15_COI	KF888310			Aas06_16S	KF888284	Hap20	46.624N, 25.740E
Romania: Valea Boului	Cris/Danube	Black Sea	>ID378			Aas01_COI	KF888296			Aas01_16S	KF888279	Hap01	47.031N, 22.858E
Romania: Valea Crisului	Mures/Danube	Black Sea	>ID461			Aas01_COI	KF888296			Aas01_16S	KF888279	Hap01	46.129N, 24.699E
Romania: Valea Crisului	Mures/Danube	Black Sea	>ID462			Aas01_COI	KF888296			Aas01_16S	KF888279	Hap01	46.129N, 24.699E
Romania: Valea Crisului	Mures/Danube	Black Sea	>ID463			Aas01_COI	KF888296			Aas01_16S	KF888279	Hap01	46.129N, 24.699E
Romania: Valea Crisului	Mures/Danube	Black Sea	>ID464			Aas01_COI	KF888296			Aas01_16S	KF888279	Hap01	46.129N, 24.699E
Romania: Valea Holita	Tisa/Danube	Black Sea	>ID499			Aas01_COI	KF888296			Aas01_16S	KF888279	Hap01	48.085N, 23.218E
Romania: Valea Mare	Tisa/Danube	Black Sea	>ID500			Aas01_COI	KF888296			Aas01_16S	KF888279	Hap01	47.978N, 23.617E
Romania: Valea Pestilor	Cris/Danube	Black Sea	>ID381			Aas25_COI	KF888320			Aas01_16S	KF888279	Hap39	47.103N, 22.661E
Romania: Valea Stoiaca	Cris/Danube	Black Sea	>ID382			Aas01_COI	KF888296			Aas01_16S	KF888279	Hap01	46.216N, 21.740E
Romania: Valea Stoiaca	Cris/Danube	Black Sea	>ID383			Aas20_COI	KF888315			Aas13_16S	KF888291	Hap40	46.216N, 21.740E
Romania: Valea Tejei	Tisa/Danube	Black Sea	>ID498			Aas01_COI	KF888296			Aas01_16S	KF888279	Hap01	47.801N, 23.891E
Romania: Venetia	Olt/Danube	Black Sea	>ID482			Aas16_COI	KF888311			Aas06_16S	KF888284	Hap23	45.845N, 25.257E
Serbia: Buser Lake, Despotovac	Velika Morava/Danube	Black Sea	>JBUS01	Ssh3				MW726582	MW726306			Hap26	44.236N, 21.393E
Serbia: Buser Lake, Despotovac	Velika Morava/Danube	Black Sea	>JBUS02	Ssh3				MW726581	MW726305			Hap26	44.236N, 21.393E
Serbia: Buser Lake, Despotovac	Velika Morava/Danube	Black Sea	>JBUS03	Ssh3				MW726580	MW726304			Hap26	44.236N, 21.393E
Serbia: Gazivode Lake, Kosovska Mitrovica	Velika Morava/Danube	Black Sea	>JGRZ02	Ssh3	Lshm3			MW726578	MW726302			Hap26	42.942N, 20.648E
Serbia: Gazivode Lake, Kosovska Mitrovica	Velika Morava/Danube	Black Sea	>JGRZ03	Ssh3	Lshm3			MW726577	MW726301			Hap26	42.942N, 20.648E
Serbia: Gazivode Lake, Kosovska Mitrovica	Velika Morava/Danube	Black Sea	>JGRZ04	Ssh3	Lshm3			MW726576	MW726300			Hap26	42.942N, 20.648E
Serbia: Gazivode Lake, Kosovska Mitrovica	Velika Morava/Danube	Black Sea	>JGRZ05	Ssh3	Lshm3			MW726575	MW726299			Hap26	42.942N, 20.648E
Serbia: Gazivode Lake, Kosovska Mitrovica	Velika Morava/Danube	Black Sea	>JGRZ06	Ssh3	Lshm3			MW726574	MW726298			Hap26	42.942N, 20.648E
Serbia: Gazivode Lake, Kosovska Mitrovica	Velika Morava/Danube	Black Sea	>JGRZ07	Ssh3	Lshm3			MW726573	MW726297			Hap26	42.942N, 20.648E
Serbia: Gazivode Lake, Kosovska Mitrovica	Velika Morava/Danube	Black Sea	>JGRZ08	Ssh3	Lshm3			MW726572	MW726296			Hap26	42.942N, 20.648E
Serbia: Gazivode Lake, Kosovska Mitrovica	Velika Morava/Danube	Black Sea	>JGRZ09	Ssh3	Lshm3			MW726571	MW726295			Hap26	42.942N, 20.648E
Serbia: Gazivode Lake, Kosovska Mitrovica	Velika Morava/Danube	Black Sea	>JGRZ10	Ssh3	Lshm3			MW726570	MW726294			Hap26	42.942N, 20.648E
Serbia: Gazivode Lake, Kosovska Mitrovica	Velika Morava/Danube	Black Sea	>JGRZ11	Ssh3	Lshm3			MW726569	MW726293			Hap26	42.942N, 20.648E
Serbia: Gazivode Lake, Kosovska Mitrovica	Velika Morava/Danube	Black Sea	>JGRZ12	Ssh3	Lshm3			MW726568					42.942N, 20.648E
Serbia: Grliško Lake, Zaječar	Timok/Danube	Black Sea	>GRLJ01	Ssh3	Lshm3			MW726604	MW726315			Hap26	43.812N, 22.232E
Serbia: Grliško Lake, Zaječar	Timok/Danube	Black Sea	>GRLJ02	Ssh3	Lshm3			MW726603	MW726314			Hap26	43.812N, 22.232E
Serbia: Grliško Lake, Zaječar	Timok/Danube	Black Sea	>GRLJ03	Ssh3	Lshm3			MW726602	MW726313			Hap26	43.812N, 22.232E
Serbia: Grliško Lake, Zaječar	Timok/Danube	Black Sea	>GRLJ04	Ssh3	Lshm3			MW726601	MW726312			Hap26	43.812N, 22.232E
Serbia: Grliško Lake, Zaječar	Timok/Danube	Black Sea	>GRLJ05	Ssh3	Lshm3			MW726600	MW726311			Hap26	43.812N, 22.232E
Serbia: Grliško Lake, Zaječar	Timok/Danube	Black Sea	>GRLJ06	Ssh3	Lshm3			MW726599	MW726310			Hap26	43.812N, 22.232E
Serbia: Grliško Lake, Zaječar	Timok/Danube	Black Sea	>GRLJ07	Ssh3	Lshm3			MW726598	MW726309			Hap26	43.812N, 22.232E
Serbia: Grliško Lake, Zaječar	Timok/Danube	Black Sea	>GRLJ08	Ssh3	Lshm3			MW726597	MW726308			Hap26	43.812N, 22.232E
Serbia: Grliško Lake, Zaječar	Timok/Danube	Black Sea	>GRLJ09	Ssh3	Lshm3			MW726596	MW726307			Hap26	43.812N, 22.232E
Serbia: Grliško Lake, Zaječar	Timok/Danube	Black Sea	>GRLJ11	Ssh3	Lshm3			MW726595					43.812N, 22.232E
Serbia: Grliško Lake, Zaječar	Timok/Danube	Black Sea	>GRLJ12	Ssh3	Lshm3			MW726594					43.812N, 22.232E
Serbia: Grliško Lake, Zaječar	Timok/Danube	Black Sea	>GRLJ13	Ssh3	Lshm3			MW726593					43.812N, 22.232E
Serbia: Gruža Lake, Knič	Velika Morava/Danube	Black Sea	>JGRU01	Ssh3				MW726579	MW726303			Hap26	43.933N, 20.683E
Serbia: Kačer River, Ljig	Sava/Danube	Black Sea	>KOZR01	Ssh1				MW726614	MW726317			Hap49	44.222N, 20.280E
Serbia: Kačer River, Ljig	Sava/Danube	Black Sea	>KOZR02	Ssh1				MW726613	MW726316			Hap49	44.222N, 20.280E
Serbia: Kačer River, Ljig	Sava/Danube	Black Sea	>KACR01	Ssh1	Lshm1			MW726625	MW726326			Hap49	44.222N, 20.280E
Serbia: Kačer River, Ljig	Sava/Danube	Black Sea	>KACR02	Ssh1	Lshm1			MW726624	MW726325			Hap49	44.222N, 20.280E
Serbia: Kačer River, Ljig	Sava/Danube	Black Sea	>KACR03	Ssh1	Lshm1			MW726623	MW726324			Hap49	44.222N, 20.280E
Serbia: Kačer River, Ljig	Sava/Danube	Black Sea	>KACR04	Ssh1	Lshm1			MW726622	MW726323			Hap49	44.222N, 20.280E
Serbia: Kačer River, Ljig	Sava/Danube	Black Sea	>KACR05	Ssh1	Lshm1			MW726621	MW726322			Hap49	44.222N, 20.280E
Serbia: Kačer River, Ljig	Sava/Danube	Black Sea	>KACR06	Ssh1	Lshm1			MW726620	MW726321			Hap49	44.222N, 20.280E
Serbia: Kačer River, Ljig	Sava/Danube	Black Sea	>KACR07	Ssh1	Lshm1			MW726619	MW726320			Hap49	44.222N, 20.280E
Serbia: Kačer River, Ljig	Sava/Danube	Black Sea	>KACR09	Ssh1	Lshm1			MW726618	MW726319			Hap49	44.222N, 20.280E
Serbia: Kačer River, Ljig	Sava/Danube	Black Sea	>KACR10	Ssh1	Lshm1			MW726617	MW726318			Hap49	44.222N, 20.280E
Serbia: Kačer River, Ljig	Sava/Danube	Black Sea	>KACR11	Ssh1	Lshm1			MW726616					44.222N, 20.280E
Serbia: Kačer River, Ljig	Sava/Danube	Black Sea	>KACR12	Ssh1	Lshm1			MW726615					44.222N, 20.280E
Serbia: Korenica Lake, Despotovac	Velika Morava/Danube	Black Sea	>JKOR01	Ssh3	Lshm3			MW726567	MW726292			Hap26	44.228N, 21.413E
Serbia: Korenica Lake, Despotovac	Velika Morava/Danube	Black Sea	>JKOR02	Ssh3	Lshm3			MW726566	MW726291			Hap26	44.228N, 21.413E
Serbia: Korenica Lake, Despotovac	Velika Morava/Danube	Black Sea	>JKOR03	Ssh3	Lshm3			MW726565	MW726290			Hap26	44.228N, 21.413E
Serbia: Korenica Lake, Despotovac	Velika Morava/Danube	Black Sea	>JKOR07	Ssh3	Lshm3			MW726564	MW726289			Hap26	44.228N, 21.413E
Serbia: Korenica Lake, Despotovac	Velika Morava/Danube	Black Sea	>JKOR08	Ssh3	Lshm3			MW726563	MW726288			Hap26	44.228N, 21.413E
Serbia: Korenica Lake, Despotovac	Velika Morava/Danube	Black Sea	>JKOR09	Ssh3	Lshm3			MW726562	MW726287			Hap26	44.228N, 21.413E
Serbia: Korenica Lake, Despotovac	Velika Morava/Danube	Black Sea	>JKOR11	Ssh3	Lshm3			MW726561	MW726286				44.228N, 21.413E
Serbia: Korenica Lake, Despotovac	Velika Morava/Danube	Black Sea	>JKOR12	Ssh3	Lshm3			MW726560	MW726285				44.228N, 21.413E
Serbia: Korenica Lake, Despotovac	Velika Morava/Danube	Black Sea	>JKOR13	Ssh3	Lshm3			MW726559	MW726284				44.228N, 21.413E
Serbia: Korenica Lake, Despotovac	Velika Morava/Danube	Black Sea	>JKOR14	Ssh3	Lshm3			MW726558	MW726283				44.228N, 21.413E
Serbia: Lepenica River, Kragujevac	Velika Morava/Danube	Black Sea	>RLEP02	Ssh3	Lshm3			MW726515	MW726259			Hap52	43.962N, 20.811E
Serbia: Milošev ribnjak, Kragujevac	Velika Morava/Danube	Black Sea	>MLR02	Ssh3	Lshm3			MW726557	MW726282			Hap26	44.092N, 20.849E
Serbia: Milošev ribnjak, Kragujevac	Velika Morava/Danube	Black Sea	>MLR05	Ssh3	Lshm3			MW726556	MW726281			Hap26	44.092N, 20.849E
Serbia: Milošev ribnjak, Kragujevac	Velika Morava/Danube	Black Sea	>MLR11	Ssh3	Lshm3			MW726555	MW726280			Hap26	44.092N, 20.849E
Serbia: Milošev ribnjak, Kragujevac	Velika Morava/Danube	Black Sea	>MLR12	Ssh3	Lshm3			MW726554	MW726279			Hap26	44.092N, 20.849E
Serbia: Milošev ribnjak, Kragujevac	Velika Morava/Danube	Black Sea	>MLR14	Ssh3	Lshm3			MW726553	MW726278			Hap26	44.092N, 20.849E
Serbia: Milošev ribnjak, Kragujevac	Velika Morava/Danube	Black Sea	>MLR15	Ssh3	Lshm3			MW726552	MW726277			Hap26	44.092N, 20.849E
Serbia: Petrovačka River, Kragujevac	Velika Morava/Danube	Black Sea	>PETR01	Ssh3				MW726545					44.052N, 20.878E
Serbia: Petrovačka River, Kragujevac	Velika Morava/Danube	Black Sea	>PETR02	Ssh3				MW726544	MW726276			Hap26	44.052N, 20.878E
Serbia: Petrovačka River, Kragujevac	Velika Morava/Danube	Black Sea	>PETR03	Ssh3				MW726543	MW726275			Hap26	44.052N, 20.878E
Serbia: Petrovačka River, Kragujevac	Velika Morava/Danube	Black Sea	>PETR05	Ssh3				MW726542	MW726274			Hap26	44.052N, 20.878E
Serbia: Petrovačka River, Kragujevac	Velika Morava/Danube	Black Sea	>PETR06	Ssh3				MW726541	MW726273			Hap26	44.052N, 20.878E
Serbia: Petrovačka River, Kragujevac	Velika Morava/Danube	Black Sea	>PETR07	Ssh3				MW726540	MW726272			Hap26	44.052N, 20.878E
Serbia: Petrovačka River, Kragujevac	Velika Morava/Danube	Black Sea	>PETR08	Ssh3				MW726539	MW726271			Hap26	44.052N, 20.878E
Serbia: Petrovačka River, Kragujevac	Velika Morava/Danube	Black Sea	>PETR09	Ssh3				MW726538	MW726270			Hap26	44.052N, 20.878E
Serbia: Petrovačka River, Kragujevac	Velika Morava/Danube	Black Sea	>PETR10	Ssh3				MW726537	MW726269			Hap26	44.052N, 20.878E
Serbia: Petrovačka River, Kragujevac	Velika Morava/Danube	Black Sea	>PETR17	Ssh4				MW726536	MW726268			Hap53	44.052N, 20.878E
Serbia: Petrovačka River, Kragujevac	Velika Morava/Danube	Black Sea	>PETR18	Ssh3				MW726535	MW726267			Hap26	44.052N, 20.878E
Serbia: Petrovačka River, Kragujevac	Velika Morava/Danube	Black Sea	>PETR19	Ssh3				MW726534	MW726266			Hap26	44.052N, 20.878E
Serbia: Petrovačka River, Kragujevac	Velika Morava/Danube	Black Sea	>PETR20	Ssh3				MW726533	MW726265			Hap26	44.052N, 20.878E
Serbia: Resnički Stream, Kragujevac	Velika Morava/Danube	Black Sea	>RESP04	Ssh3	Lshm3			MW726525	MW726264			Hap26	44.090N, 20.937E
Serbia: Resnički Stream, Kragujevac	Velika Morava/Danube	Black Sea	>RESP06	Ssh3	Lshm3			MW726524					44.090N, 20.937E
Serbia: Resnički Stream, Kragujevac	Velika Morava/Danube	Black Sea	>RESP07	Ssh3	Lshm3			MW726523	MW726263			Hap26	44.090N, 20.937E
Serbia: Resnički Stream, Kragujevac	Velika Morava/Danube	Black Sea	>RESP09	Ssh3	Lshm3			MW726522	MW726262			Hap26	44.090N, 20.937E
Serbia: Resnički Stream, Kragujevac	Velika Morava/Danube	Black Sea	>RESP10	Ssh3	Lshm3			MW726521	MW726261			Hap26	44.090N, 20.937E
Serbia: Resnički Stream, Kragujevac	Velika Morava/Danube	Black Sea	>RESP11	Ssh3	Lshm3			MW726520					44.090N, 20.937E
Serbia: Resnički Stream, Kragujevac	Velika Morava/Danube	Black Sea	>RESP12	Ssh3	Lshm3			MW726519					44.090N, 20.937E
Serbia: Resnički Stream, Kragujevac	Velika Morava/Danube	Black Sea	>RESP14	Ssh3	Lshm3			MW726518	MW726260			Hap26	44.090N, 20.937E
Serbia: Resnički Stream, Kragujevac	Velika Morava/Danube	Black Sea	>RESP15	Ssh3	Lshm3			MW726517					44.090N, 20.937E
Serbia: Resnički Stream, Kragujevac	Velika Morava/Danube	Black Sea	>RESP16	Ssh3	Lshm3			MW726516					44.090N, 20.937E
Slovenia: Kočevska reka	Sava/Danube	Black Sea	>KOCEV01	Ssh10	Lshm9			MW726413	MW726217			Hap51	45.573N, 14.797E
Slovenia: Kočevska reka	Sava/Danube	Black Sea	>KOCEV02	Ssh10	Lshm9			MW726412	MW726216			Hap51	45.573N, 14.797E
Slovenia: Kočevska reka	Sava/Danube	Black Sea	>KOCEV03	Ssh10	Lshm9			MW726411	MW726215			Hap51	45.573N, 14.797E
Slovenia: Kočevska reka	Sava/Danube	Black Sea	>KOCEV04	Ssh10	Lshm9			MW726410	MW726214			Hap51	45.573N, 14.797E
Slovenia: Kočevska reka	Sava/Danube	Black Sea	>KOCEV05	Ssh10	Lshm9			MW726409	MW726213			Hap51	45.573N, 14.797E
Slovenia: Kočevska reka	Sava/Danube	Black Sea	>KOCEV06	Ssh10	Lshm9			MW726408	MW726212			Hap51	45.573N, 14.797E
Slovenia: Kočevska reka	Sava/Danube	Black Sea	>KOCEV07	Ssh10	Lshm9			MW726407	MW726211			Hap51	45.573N, 14.797E
Slovenia: Lake Bled	Sava/Danube	Black Sea	>BLED01	Ssh10				MW726427	MW726230			Hap51	46.364N, 14.094E
Slovenia: Lake Bled	Sava/Danube	Black Sea	>BLED02	Ssh10				MW726426	MW726229			Hap51	46.364N, 14.094E
Slovenia: Lake Bled	Sava/Danube	Black Sea	>BLED04	Ssh10				MW726425	MW726228			Hap51	46.364N, 14.094E
Slovenia: Lake Bloke	Sava/Danube	Black Sea	>BLOKE01	Ssh10	Lshm9			MW726424	MW726227			Hap51	45.786N, 14.516E
Slovenia: Lake Bloke	Sava/Danube	Black Sea	>BLOKE02	Ssh10	Lshm9			MW726423	MW726226			Hap51	45.786N, 14.516E
Slovenia: Lake Bloke	Sava/Danube	Black Sea	>BLOKE03	Ssh10	Lshm9			MW726422	MW726225			Hap51	45.786N, 14.516E
Slovenia: Lake Bloke	Sava/Danube	Black Sea	>BLOKE04	Ssh10	Lshm9			MW726421	MW726224			Hap51	45.786N, 14.516E
Slovenia: Lake Bloke	Sava/Danube	Black Sea	>BLOKE05	Ssh10	Lshm9			MW726420	MW726223			Hap51	45.786N, 14.516E
Slovenia: Lake Bloke	Sava/Danube	Black Sea	>BLOKE06	Ssh10	Lshm9			MW726419	MW726222			Hap51	45.786N, 14.516E
Slovenia: Lake Bloke	Sava/Danube	Black Sea	>BLOKE07	Ssh10	Lshm9			MW726418	MW726221			Hap51	45.786N, 14.516E
Slovenia: Lake Bloke	Sava/Danube	Black Sea	>BLOKE08	Ssh10	Lshm9			MW726417	MW726220			Hap51	45.786N, 14.516E
Slovenia: Lake Bloke	Sava/Danube	Black Sea	>BLOKE09	Ssh10	Lshm9			MW726416	MW726219			Hap51	45.786N, 14.516E
Slovenia: Lake Bloke	Sava/Danube	Black Sea	>BLOKE10	Ssh10	Lshm9			MW726415	MW726218			Hap51	45.786N, 14.516E
Slovenia: Lake Bloke	Sava/Danube	Black Sea	>BLOKE11	Ssh10	Lshm9			MW726414					45.786N, 14.516E

## Sheet: Table S2
Table S2. Name of Astacus astacus concatenated (COI and 16S rRNA sequences) haplotypes and references
Concatenated haplotype	Reference
Hap1	Scrimpf et al., 2014
Hap2	Scrimpf et al., 2014
Hap3	Scrimpf et al., 2014
Hap4	Scrimpf et al., 2014
Hap5	Scrimpf et al., 2014
Hap6	Scrimpf et al., 2014
Hap7	Scrimpf et al., 2014
Hap8	Scrimpf et al., 2014
Hap9	Scrimpf et al., 2014
Hap10	Scrimpf et al., 2014
Hap11	Scrimpf et al., 2014
Hap12	Scrimpf et al., 2014
Hap13	Scrimpf et al., 2014
Hap14	Scrimpf et al., 2014
Hap15	Scrimpf et al., 2014
Hap16	Scrimpf et al., 2014
Hap17	Scrimpf et al., 2014
Hap18	Scrimpf et al., 2014
Hap19	Scrimpf et al., 2014
Hap20	Scrimpf et al., 2014
Hap21	Scrimpf et al., 2014
Hap22	Scrimpf et al., 2014
Hap23	Scrimpf et al., 2014
Hap24	Scrimpf et al., 2014
Hap25	Scrimpf et al., 2014
Hap26	Scrimpf et al., 2014
Hap27	Scrimpf et al., 2014
Hap28	Scrimpf et al., 2014
Hap29	Scrimpf et al., 2014
Hap30	Scrimpf et al., 2014
Hap31	Scrimpf et al., 2014
Hap32	Scrimpf et al., 2014
Hap33	Scrimpf et al., 2014
Hap34	Scrimpf et al., 2014
Hap35	Scrimpf et al., 2014
Hap36	Scrimpf et al., 2014
Hap37	Scrimpf et al., 2014
Hap38	Scrimpf et al., 2014
Hap39	Scrimpf et al., 2014
Hap40	Scrimpf et al., 2014
Hap41	Scrimpf et al., 2014
Hap42	Scrimpf et al., 2014
Hap43	Scrimpf et al., 2014
Hap44	Scrimpf et al., 2014
Hap45	Scrimpf et al., 2014
Hap46	Scrimpf et al., 2014
Hap47	Scrimpf et al., 2017
Hap48	Scrimpf et al., 2017
Hap49	This study
Hap50	This study
Hap51	This study
Hap52	This study
Hap53	This study
Hap54	This study
A2C15	Laggis et al., 2017
A2C29	Laggis et al., 2017
A2C33	Laggis et al., 2017
A2C21	Laggis et al., 2017
A2C21	Laggis et al., 2017
A2C28	Laggis et al., 2017
A2C34	Laggis et al., 2017
A1C30	Laggis et al., 2017
A2C35	Laggis et al., 2017
A2C21	Laggis et al., 2017
A16C10	Laggis et al., 2017
A3C32	Laggis et al., 2017
A2C1	Laggis et al., 2017
A2C14	Laggis et al., 2017
A2C2	Laggis et al., 2017
A2C2	Laggis et al., 2017
A2C27	Laggis et al., 2017
A2C31	Laggis et al., 2017
A2C31	Laggis et al., 2017
A2C1	Laggis et al., 2017
A2C40	Laggis et al., 2017
A2C5	Laggis et al., 2017
A2C8	Laggis et al., 2017
A2C50	Laggis et al., 2017
A2C52	Laggis et al., 2017
A2C18	Laggis et al., 2017
A2C31	Laggis et al., 2017
A4C1	Laggis et al., 2017
A4C51	Laggis et al., 2017
Schrimpf, A., Piscione, M., Cammaerts, R., Collas, M., Herman, D., Jung, A., et al. (2017). Genetic characterization of Western European noble crayfish populations (Astacus astacus) for advanced conservation management strategies. Conserv. Genet. 18, 1299-1315. doi: 10.1007/s10592-017-0981-3
Schrimpf, A., Theissinger, K., Dahlem, J., Maguire, I., Pârvulescu, L., Schulz, H., et al. (2014). Phylogeography of noble crayfish (Astacus astacus) reveals multiple refugia. Freshw. Biol. 59, 761-776. doi: 10.1111/fwb.12302
Laggis, A., Baxevanis, A.D., Charalampidou, A., Maniatsi, S., Triantafyllidis, A., and Abatzopoulos, T. (2017). Microevolution of the noble crayfish (Astacus astacus) in the Southern Balkan Peninsula. BMC Evol. Biol. 17, 122. doi: 10.1186/s12862-017-0971-6

## Sheet: Table S3
Table S3. PCR conditions and variability of tetranucleotide microsatellite loci of the 10-plex and 9-plex microsatellite assays in 413 Individuals from 18 populations of A. astacus in Balkan Peninsula
Locus name	Multiplex	Fluorescent label of F-primer	Alternative fluorescent label (AB*) of F-primer	Conc. F-primer (nM)	Conc. R-primer (nM)	No. of alleles	Observed allele size range (bp)	Observed hetero-zygosity
Aast4_2	10-plex	6FAM	6FAM	200	200	7	83 - 111	0.254237
Aast4_17	10-plex	6FAM	6FAM	200	200	26	(88**) 158 - 232	0.51816
Aast4_46	10-plex	6FAM	6FAM	200	200	13	278 - 326	0.496368
Aast4_20	10-plex	ATTO 550	NED	200	200	16	141 - 213	0.423729
Aast4_38	10-plex	ATTO 550	NED	200	200	15	242 - 280	0.435835
Aast4_16	10-plex	ATTO 565	PET	200	200	11	164 - 204	0.394673
Aast4_35	10-plex	ATTO 565	PET	200	200	9	232 - 272	0.455206
Aast4_3	10-plex	Yakima Yellow	VIC	400	400	14	91 - 135	0.496368
Aast4_19	10-plex	Yakima Yellow	VIC	200	200	7	181 - 209	0.305085
Aast4_37	10-plex	Yakima Yellow	VIC	200	200	8	235 - 263	0.416465
Aast4_7	9-plex	6FAM	6FAM	200	200	6	136 - 160	0.32767
Aast4_42	9-plex	6FAM	6FAM	200	200	14	220 - 276	0.3425
Aast4_32	9-plex	ATTO 550	NED	200	200	9	224 - 256	0.353511
Aast4_48	9-plex	ATTO 550	NED	400	400	13	264 - 360	0.455206
Aast4_26	9-plex	ATTO 565	PET	200	200	-	-	-
Aast4_47	9-plex	ATTO 565	PET	200	200	-	-	-
Aast4_10	9-plex	Yakima Yellow	VIC	200	200	-	-	-
Aast4_30	9-plex	Yakima Yellow	VIC	300	300	-	-	-
Aast4_44	9-plex	Yakima Yellow	VIC	300	300	12	265 - 321	0.435523
*Applied Biosystems
** allele ’88 bp’ was found only in MAK and TOT populations
					Total	180
					Average	12		0.407369

## Sheet: Table S4
Table S4. Genetic differentiation of studied Astacus astacus populations: ΦST pairwise values (COI data) are shown above the diagonal and FST pairwise values (microsatellite data) are given below the diagonal. All values are significant (P<0.05) except ones marked with asterisks.
	KOC	BLO	JAR	PLI	MAK	KAC	MOT	TOT	JAN	VUK	RES	KOR	GAZ	GRL	SOM	PET	BEZ	PRE
KOC		0*	1000	1000	1000	1000	0.639	1000	0.705	1000	1000	1000	1000	1000	0.993	1000	1000	1000
BLO	0.341		1000	1000	1000	1000	0.683	1000	0.747	1000	1000	1000	1000	1000	0.994	1000	1000	1000
JAR	0.343	0.334		0*	1000	1000	0.712	1000	0.654	1000	1000	1000	1000	1000	0.987	1000	1000	1000
PLI	0.511	0.399	0.219		1000	1000	0.577	1000	0.489	1000	1000	1000	1000	1000	0.979	1000	1000	1000
MAK	0.597	0.522	0.509	0.570		1000	0.758	0*	0.809	1000	1000	1000	1000	1000	0.996	1000	1000	1000
KAC	0.467	0.407	0.363	0.436	0.498		0.718	1000	0.682	1000	1000	1000	1000	1000	0.989	1000	1000	1000
MOT	0.382	0.330	0.211	0.298	0.449	0.370		0.751	0.15*	0.543	0.591	0.591	0.602	0.612	0.587	0.547	0.513	0.790
TOT	0.383	0.363	0.321	0.399	0.378	0.353	0.277		0.803	1000	1000	1000	1000	1000	0.996	1000	1000	1000
JAN	0.423	0.423	0.320	0.344	0.469	0.375	0.277	0.289		0.752	0.461	0.461	0.474	0.487	0.236	0.295	0.158*	0.800
VUK	0.475	0.434	0.442	0.510	0.539	0.477	0.420	0.392	0.448		1000	1000	1000	1000	0.996	1000	1000	1000
RES	0.445	0.380	0.371	0.411	0.447	0.339	0.325	0.304	0.334	0.462		0*	0*	0*	0.974	1000	1000	1000
KOR	0.490	0.479	0.445	0.536	0.633	0.488	0.442	0.421	0.424	0.588	0.382		0*	0*	0.974	1000	1000	1000
GAZ	0.728	0.612	0.588	0.726	0.695	0.564	0.526	0.490	0.536	0.667	0.367	0.669		0*	0.975	1000	1000	1000
GRL	0.705	0.575	0.564	0.726	0.644	0.518	0.489	0.490	0.508	0.608	0.489	0.706	0.825		0.976	1000	1000	1000
SOM	0.588	0.489	0.494	0.581	0.574	0.368	0.456	0.345	0.384	0.574	0.423	0.553	0.691	0.640		0.914	-0.048*	0.995
PET	0.595	0.539	0.472	0.577	0.630	0.471	0.413	0.334	0.308	0.578	0.493	0.600	0.753	0.759	0.535		1000	1000
BEZ	0.718	0.607	0.535	0.658	0.667	0.537	0.466	0.437	0.297	0.655	0.557	0.702	0.831	0.838	0.583	0.388		1000
PRE	0.714	0.643	0.568	0.672	0.698	0.551	0.584	0.557	0.594	0.662	0.616	0.722	0.808	0.799	0.701	0.726	0.783
